# Supplementary material for: Elucidation of the GSK3α Structure Informs the Design of Novel, Paralog-Selective Inhibitors
Source: PubMed Central journal article supplement — ACS Chem Neurosci. 2023 Feb 22;14(6):1080–94. doi: 10.1021/acschemneuro.2c00476 (PMC10020971; doi:10.1021/acschemneuro.2c00476), 2023-02-22
Supplement: cn2c00476_si_001.pdf [file cn2c00476_si_001.pdf]

## Supporting Information for Publication:

Title: Elucidation of GSK3 $\alpha$  structure informs the design of novel, paralog-selective inhibitors

### Author List:

Brenda Amaral<sup>1,#</sup>, Andrew Capacci<sup>2,#,\*</sup>, Trip Anderson<sup>1</sup>, Ceren Tezer<sup>1</sup>, Bekim Bajrami<sup>3</sup>, Mukesh Lulla<sup>4</sup>, Brian Lucas<sup>2</sup>, Jayanth V. Chodaparambil<sup>5</sup>, Douglas Marcotte<sup>5</sup>, P. Rajesh Kumar<sup>5</sup>, Paramasivam Murugan<sup>6</sup>, Kerri Spilker<sup>5</sup>, Mike Cullivan<sup>5</sup>, Ti Wang<sup>6</sup>, Anton C. Petersen<sup>2</sup>, Istvan Enyedy<sup>2</sup>, Bin Ma<sup>2</sup>, TeYu Chen<sup>2</sup>, Zain Yousaf<sup>2</sup>, Michael Calhoun<sup>1</sup>, Olga Golonzhka<sup>1</sup>, Gregory M. Dillon<sup>1,¶</sup> and Samir Koirala<sup>1,¶</sup>

Departments of <sup>1</sup>Research, <sup>2</sup>Medicinal Chemistry, <sup>3</sup>Chemical Biology and Proteomics, <sup>4</sup>Drug Metabolism and Pharmacokinetics, <sup>5</sup>Physical Biochemistry and <sup>6</sup>Bioassays, Biogen, 225 Binney Street, Cambridge, MA 02142, United States

#Co-first authors – contributed equally to the work

¶¶Co-last authors – contributed equally to design and execution of this work

\*Corresponding Author: Andrew Capacci <andrew.capacci@biogen.com>

Figure S1: Phosphorylation of additional epitopes on tau by GSK3 $\alpha$  and  $\beta$

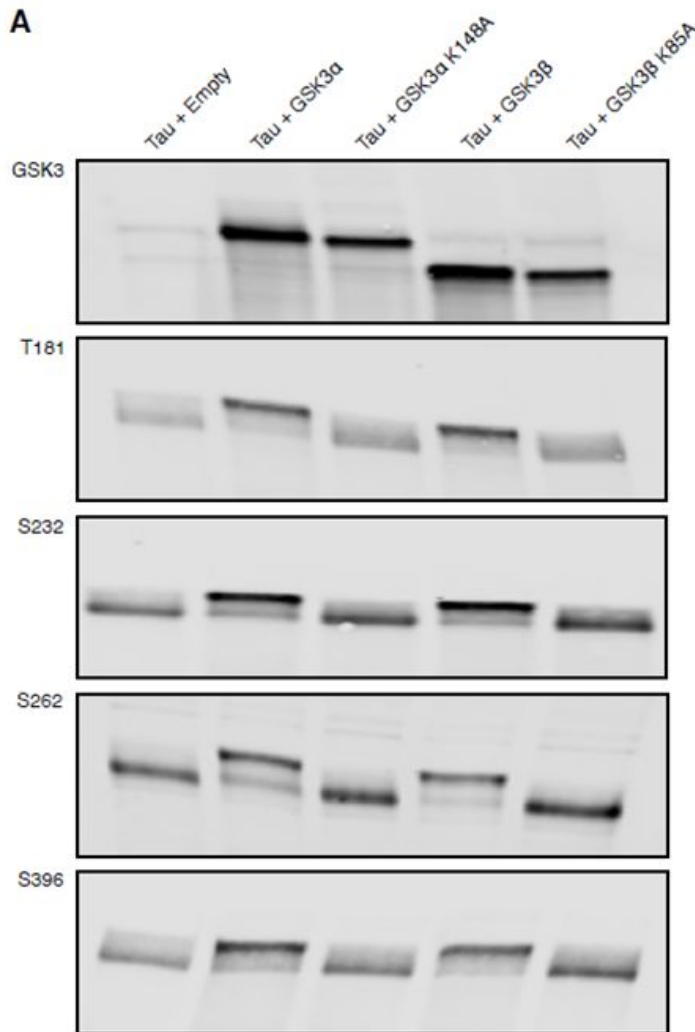

Supplemental Figure 1: Phosphorylation of additional epitopes on tau by GSK3 paralogs

HEK293 cells stably expressing human 2N4R tau (HEK-huTau) were transfected with plasmids expressing human GSK3 $\alpha$ , human GSK3 $\beta$ , or kinase dead mutants in which the catalytic lysine of each kinase was mutated to an alanine. Twenty-four hours after transfection, cells were lysed. Cell lysates were run by SDS page to probe for phosphorylation of tau at different epitopes. Both GSK3 $\alpha$  and GSK3 $\beta$  isoforms phosphorylate tau at multiple epitopes including T181, S232, S262, S396.

Figure S2: Specificity of Thr231 plate-based assay

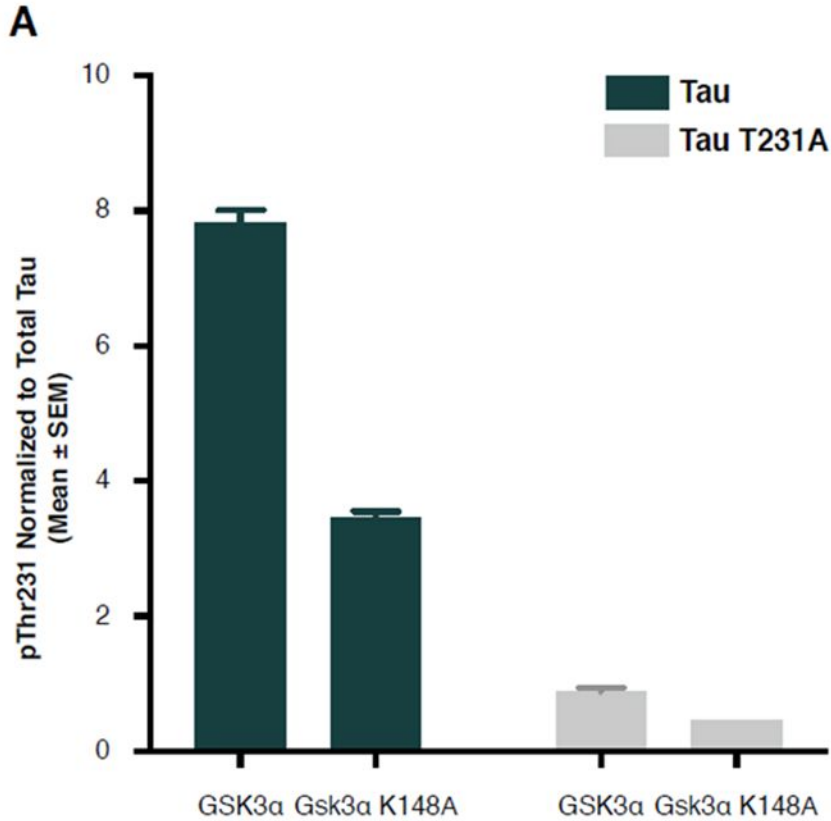

Supplemental Figure 2: Specificity of Thr231 plate-based assay

HEK293 cells expressing either human 2N4R tau or human tau with a Tyrosine to Alanine substitution at amino acid position 231 were transfected with plasmids expressing active human GSK3 $\alpha$  or a kinase-dead version GSK3 $\alpha$  K148A. 24 hours after transfection cell lysates were taken to probe for phosphorylated and total tau. A plate-based assay was used to measure phosphorylation of Tau at Thr231. Results demonstrate that the assay signal increased with GSK3 $\alpha$  kinase activity and the capture antibody was specific to phosphorylation at Thr231.

Figure S3: Effect of GSK3 inhibitors on tau phosphorylation at Ser202 and Thr205

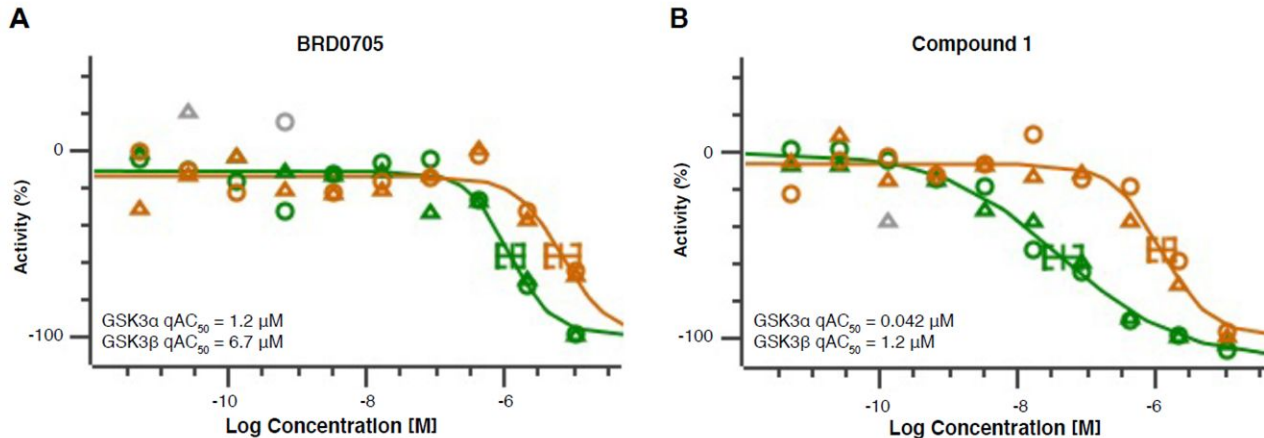

Supplemental Figure 3: Effect of GSK3 inhibitors on tau phosphorylation at Ser202 and Thr205

HEK293 cells stably expressing human 2N4R tau (HEK-huTau) were transfected with plasmids expressing human GSK3 $\alpha$  or human GSK3 $\beta$ . 24 hours after transfection, compounds were added at a 10-point dose response curve (range: 3nM-30 $\mu$ M) for 2 hours, and cell lysates were probed for total tau and tau phosphorylated at S202/T205 using FRET antibodies custom designed by Cisbio (S202/T205 Tb and total Tau D2 FRET antibodies). IC<sub>50</sub> curves demonstrating cellular potency and GSK3 paralog selectivity of a previously identified GSK3 $\alpha$  selective compound BRD0705 (A) and a novel GSK3 $\alpha$  selective compound Compound 1 (B).

Figure S4: EC<sub>50</sub> for Nanobret Tracer 8 at GSK3 $\alpha$  and GSK3 $\beta$

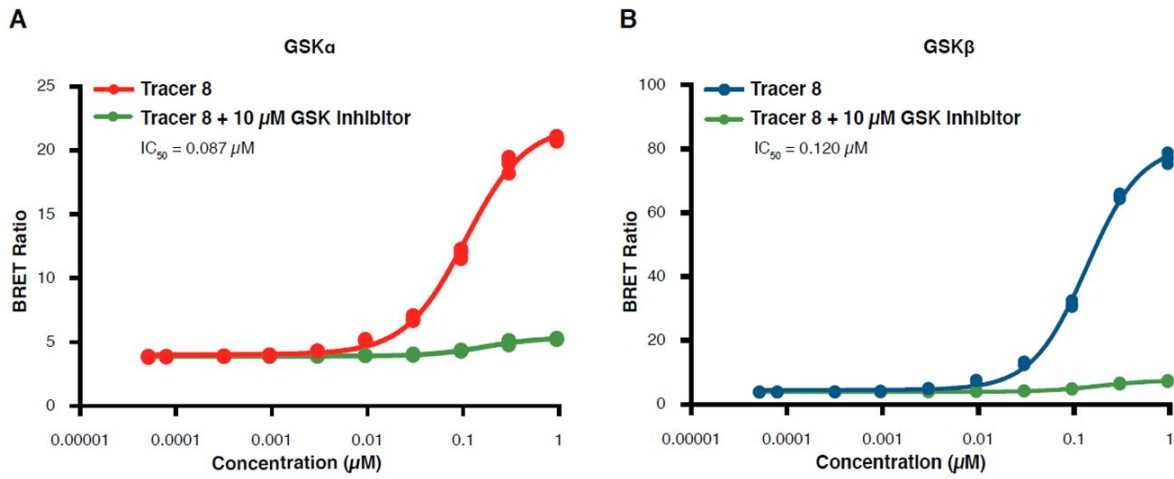

Supplemental Figure 4: EC<sub>50</sub> for Nanobret Tracer 8 at GSK3 $\alpha$  and GSK3 $\beta$

HEK293T cells were transiently transfected with either NanoLuc-GSK3 $\alpha$  or NanoLuc-GSK3 $\beta$  plasmids and the following day treated for 2 hours with NanoBRET Tracer-8 at a 10-point dose response curve (at a range of 0.1nM-1 $\mu$ M). Cells were incubated in the presence or absence of a saturating dose of Compound 1 at 10 $\mu$ M.

Figure S5: Kinetics of free drug concentration for Compound 1 after administration in P10 rats

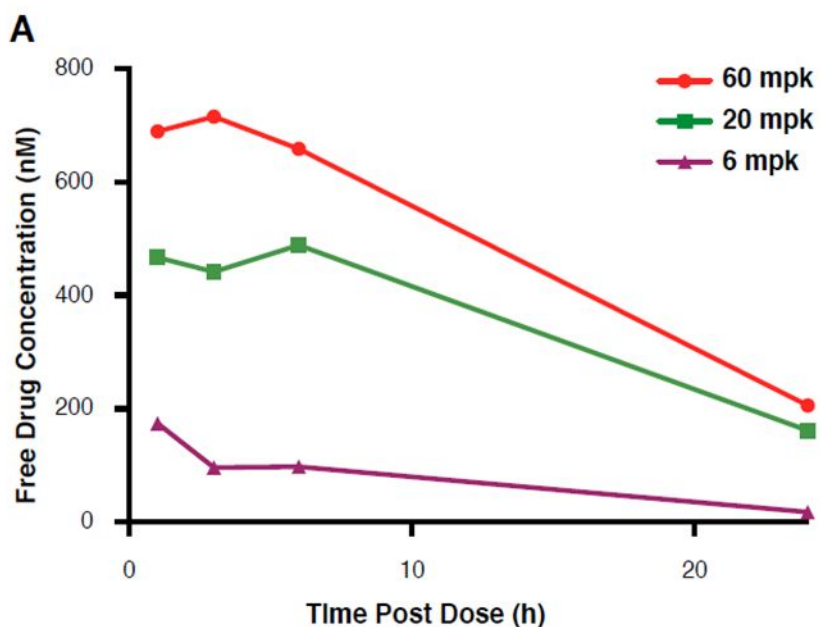

Supplemental Figure 5: Kinetics of free drug concentration for Compound 1 after administration in P10 rats

P10 rats were injected with Compound 1 at 60, 20 and 6 mg/kg and sacrificed at several time points following treatment. Free drug concentration in the brain was estimated based on plasma protein binding data and demonstrates a C<sub>max</sub> of 715nM for the 60mpk dose, three hours after injection.

Figure S6: Target engagement of Compound 1 with identified off-target kinases demonstrating greater than 70% occupancy three hours post-dosing.

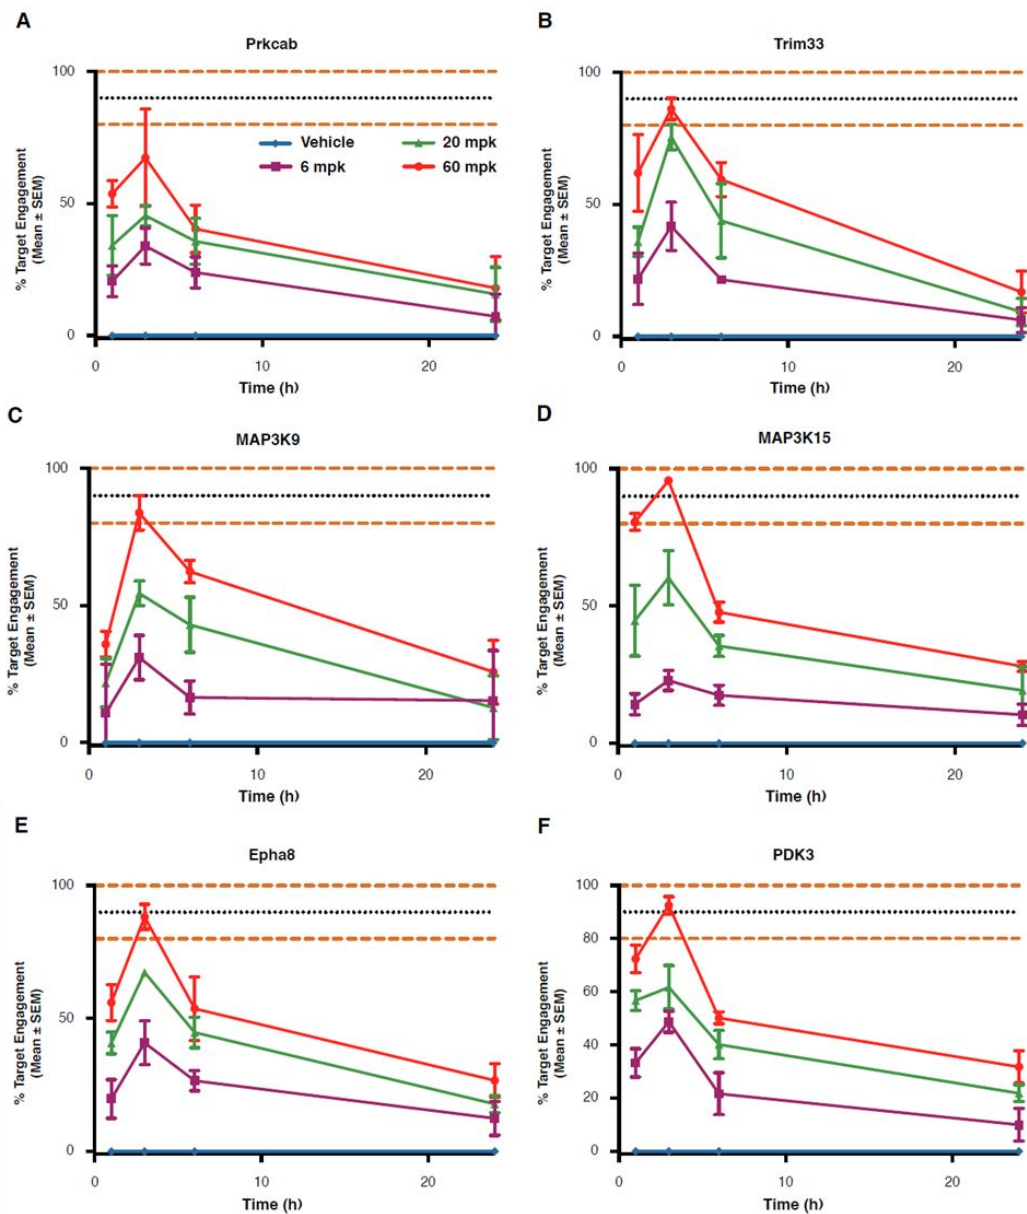

Supplemental Figure 6: Target engagement of Compound 1 with identified off-target kinases demonstrating greater than 70% occupancy three hours post-dosing.

To measure target engagement, brain lysates were incubated with non-selective kinase inhibitors coupled to sepharose beads (kinobeads; Bantscheff et.al.,2007). Enriched proteins were analyzed by liquid chromatography coupled with tandem mass spectrometry. Target engagement was then measured as competitive displacement of Compound 1 with the non-selective beads. Our results show that at the highest dose tested (60mg/kg) there were only 6 out of 251 unique detected kinases detected (other than GSK3 $\alpha$ ) which had a target engagement of greater than 70%.

Figure S7: Potency of Compound 2 and Compound 3 to activate  $\beta$ -catenin nuclear translocation.

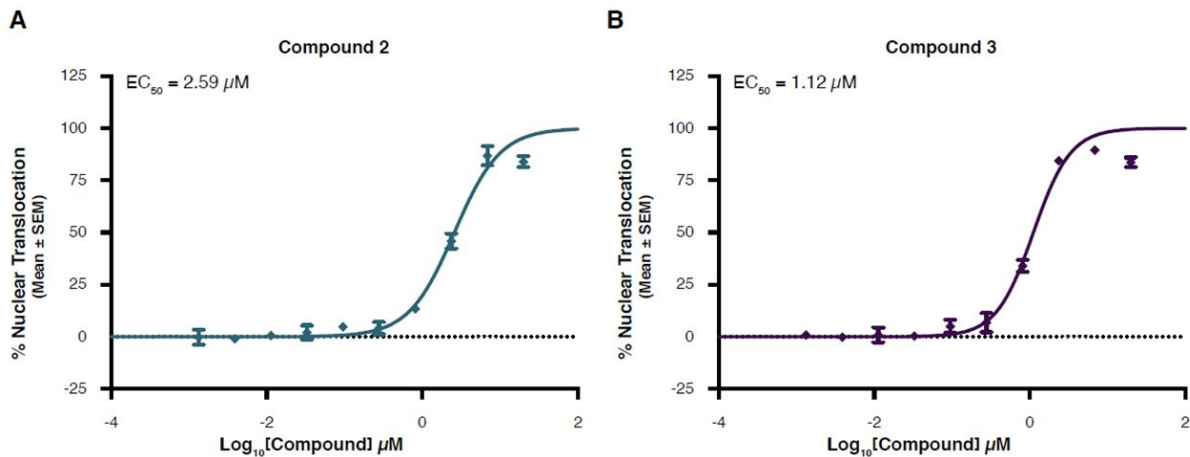

Supplemental Figure 7: Potency of Compound 2 and Compound 3 to activate  $\beta$ -catenin nuclear translocation.

To examine  $\beta$ -catenin activation we looked for protein translocation to the nucleus in SH-SY5Y cells 6 hours after compound addition at a 9-point dose response curve (range of 20 $\mu$ M-20nM). IC<sub>50</sub> curves demonstrating potencies of novel GSK3 $\alpha$  selective inhibitors to cause  $\beta$ -catenin translocation to the nucleus.



Figure S8: None of the compounds evaluated in the current study showed cellular toxicity up to 30 $\mu$ M.

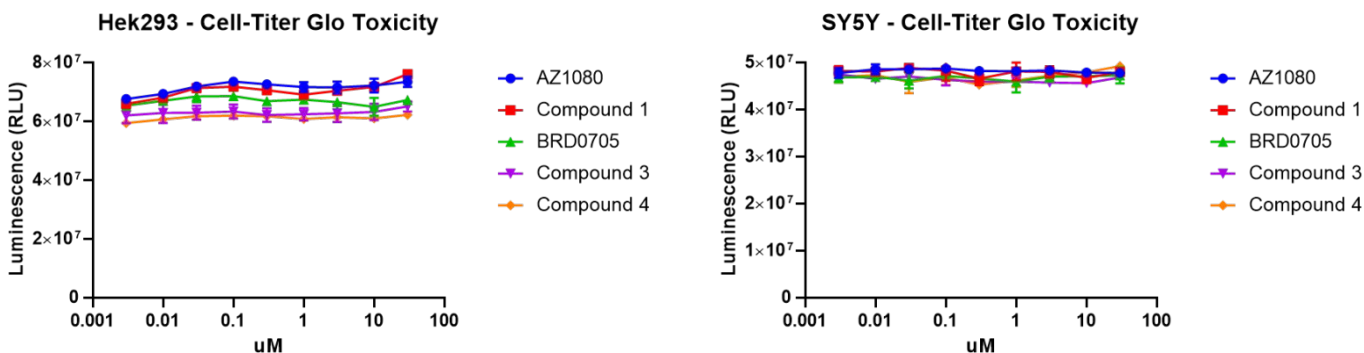

Figure S8: None of the compounds evaluated in the current study showed cellular toxicity up to 30 $\mu$ M.

HEK293 and SY5Y cells treated in 10 point dose response up to 30  $\mu$ M. HEK293 cells were treated for 2 hrs and SY5Y cells for 6 hrs). 100  $\mu$ l of Promega CellTiter-Glo 2.0 was added to each well of a 96 well culture plate. Plates were shaken for 2 mins at room temperature, allowed to incubate for an additional 10 mins, after which 150  $\mu$ l of each sample was transferred to a white, 96-well Opti-plate and luminescence was read on an Envision plate reader (Molecular Devices).

Figure S9: High resolution image of Figure 4E - kinome tree indicating all kinases inhibited by Compound 1 at 60 mpk, 3 hours after administration.

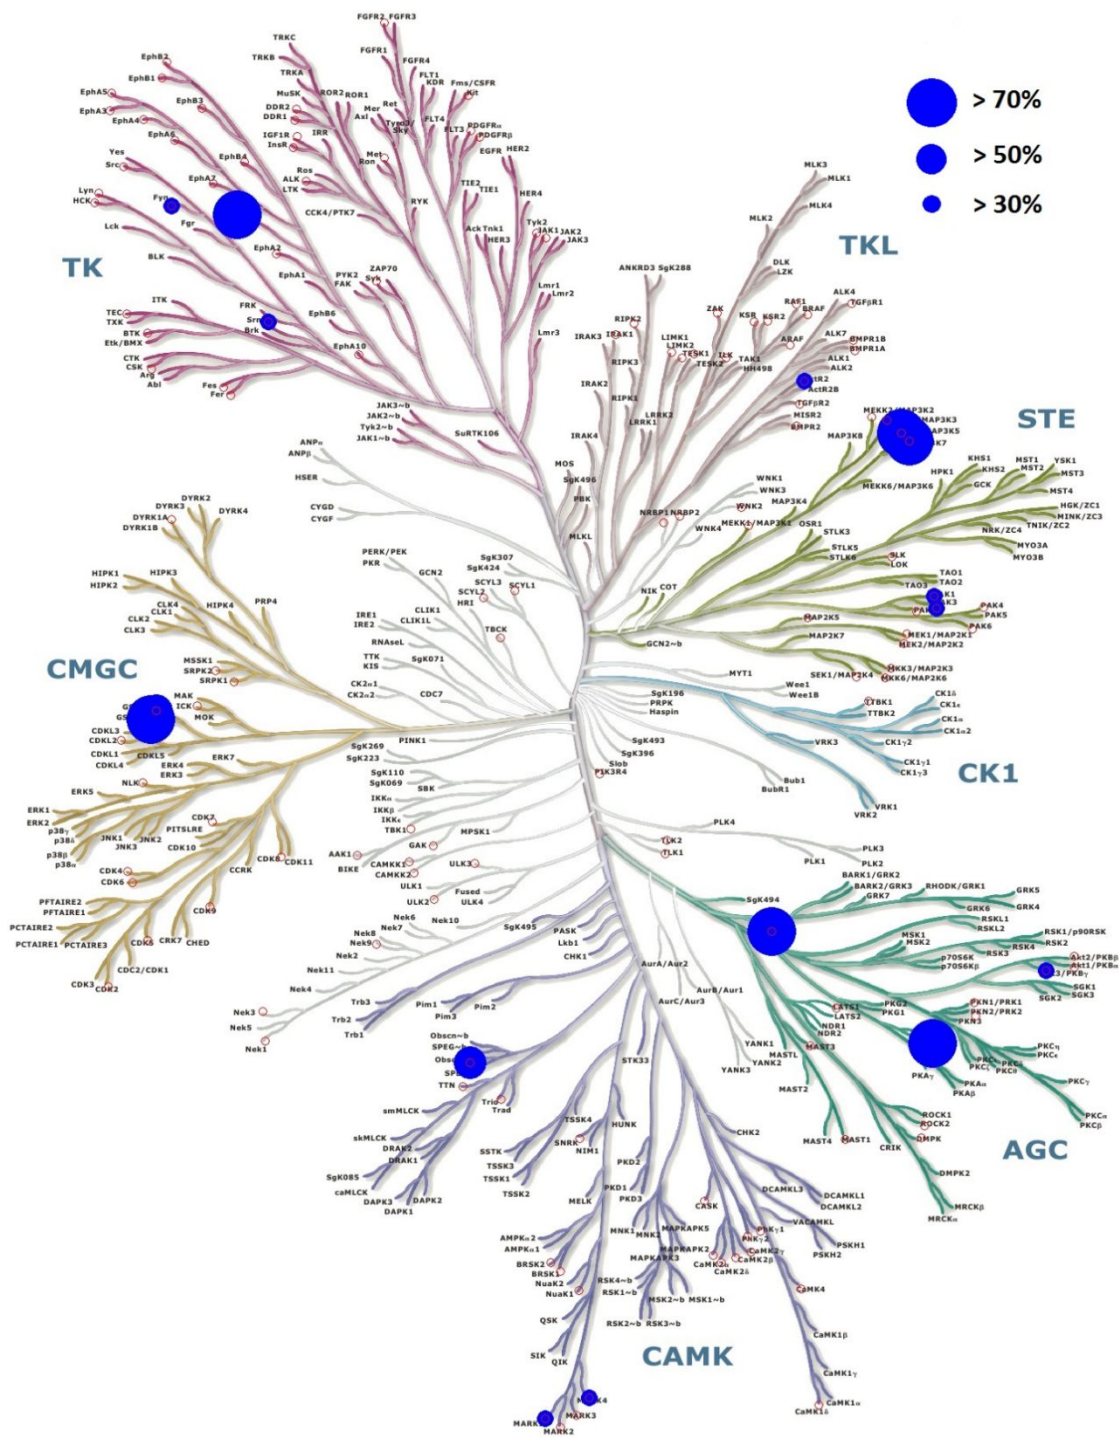

Supplemental Table 1: ADME Properties of Compound 1

| Assay                                                                                  | Compound 1           |
|----------------------------------------------------------------------------------------|----------------------|
| Multidrug resistant transporter P-glycoprotein (MDR1) $P_{A-B}/P_{B-A}$ (efflux ratio) | 0.9 / 38 (41)        |
| LM intrinsic clearance ( $Cl_{int}$ ) (rat, human)                                     | 56.1, 15.2 mL/min/kg |
| Hepatocyte $Cl_{int}$ (rat, human)                                                     | 7.5, 9.2 mL/min/kg   |
| Cytochrome P450 (Cyp) 3A4T $IC_{50}$                                                   | 1.8 $\mu$ M          |
| Cyp 3A4M $IC_{50}$                                                                     | 1.5 $\mu$ M          |
| Cyp 2D6 $IC_{50}$                                                                      | >10 $\mu$ M          |
| Cyp 2C19 $IC_{50}$                                                                     | >10 $\mu$ M          |
| Cyp 1A2 $IC_{50}$                                                                      | >10 $\mu$ M          |
| Cyp 2C9 $IC_{50}$                                                                      | 9.75 $\mu$ M         |
| Cyp 2C8 $IC_{50}$                                                                      | >10 $\mu$ M          |
| Solubility at pH = 6.8                                                                 | 22.6 $\mu$ g/mL      |
| Plasma protein binding fraction unbound (rat, human, mouse)                            | 3.12, 1.97, 1.84 %   |
| Human ether-a-go-go-related gene (hERG) $IC_{50}$                                      | >30 $\mu$ M          |
| Molecular weight (MW)                                                                  | 407.4                |
| Total polar surface area (tPSA)                                                        | 57.8                 |
| cLogP                                                                                  | 3.5                  |

Supplemental Table 2: Data collection and refinement statistics for crystallography

| Data Collection/refinement statistics  | BRD-0705 bound to GSK3alpha-axin complex | BRD0705 bound to GSK3beta-axin complex        | Compound 3 bound to GSK3alpha-axin complex | Compound 3 bound to GSK3beta-axin complex     |
|----------------------------------------|------------------------------------------|-----------------------------------------------|--------------------------------------------|-----------------------------------------------|
| PDB Code                               | 7SXF                                     | 7SXJ                                          | 7SXG                                       | 7SXH                                          |
| Space Group                            | C 2                                      | P2 <sub>1</sub> 2 <sub>1</sub> 2 <sub>1</sub> | C 2                                        | P2 <sub>1</sub> 2 <sub>1</sub> 2 <sub>1</sub> |
| a, b, c (Å)                            | 119, 55, 66                              | 68, 73, 82                                    | 120, 55, 66                                | 68, 72, 79                                    |
| α, β, γ (°)                            | 90, 97, 90                               | 90, 90, 90                                    | 90, 97, 90                                 | 90, 90, 90                                    |
| Resolution (Å)                         | 1.94                                     | 50-1.85                                       | 2.4                                        | 2.1                                           |
| R <sub>sym</sub> <sup>a</sup>          | 0.03                                     | 0.03                                          | 0.06                                       | 0.06                                          |
| I/σ                                    | 24.3                                     | 29.13                                         | 12.26                                      | 14.65                                         |
| Multiplicity                           | 3.5                                      | 6.6                                           | 3.4                                        | 6.5                                           |
| Total / unique reflections             | 109474/31641                             | 237493/36167                                  | 58008/16932                                | 155896/23943                                  |
| Completeness (%)                       | 97.7 (91.06)                             | 99.9 (99.9)                                   | 96 (98)                                    | 99.3 (95.0)                                   |
| Rwork (Rfree)                          | 20/23                                    | 17.9/20.2                                     | 23/26                                      | 21/25                                         |
| CC <sub>1/2</sub>                      | 0.99 (0.97)                              | 0.99 (0.72)                                   | 0.99 (0.54)                                | 0.99 (0.6)                                    |
| R.m.s.d. bond distance (Å)             | 0.006                                    | 0.01                                          | 0.003                                      | 0.003                                         |
| R.m.s.d bond angle (deg)               | 0.89                                     | 1.00                                          | 0.55                                       | 0.97                                          |
| Avg. protein B-value (Å <sup>2</sup> ) | 61.6                                     | 47.83                                         | 72.99                                      | 57.8                                          |
| Avg. solvent B-value (Å <sup>2</sup> ) | 53.4                                     | 48.22                                         | 57.39                                      | 53.7                                          |
| Ramachandran Values                    |                                          |                                               |                                            |                                               |
| Preferred                              | 97.6                                     | 97                                            | 97                                         | 98.2                                          |
| Allowed                                | 2.3                                      | 3                                             | 3                                          | 1.8                                           |
| Disallowed                             | 0                                        | 0                                             | 0                                          | 0                                             |

\*The value in parentheses is for the highest resolution bin (approximate interval, 0.1 Å),  $aR_{sym} = \sum_i \sum_h \sum_k |f_i(hkl) - \langle f_i(hkl) \rangle| / \sum_i \sum_h \sum_k f_i(hkl)$   $bR_{work} = \sum_i \sum_h \sum_k |f_o - |F_c|| / \sum_i \sum_h \sum_k |F_o|$  for all data except 5% which is used for the Rfree calculation

Supplemental Table 3: LC-MS/MS conditions for the analysis of free drugs in the brain tissues.

**HPLC Operating Conditions:**

Column: Phenomenex Kinetix C18, 50 X 3.0 mm, 2.6 μm  
 Mobile phase A: 0.1 % formic acid in water  
 Mobile Phase B: 0.1 % formic acid in acetonitrile  
 Injection Volume: 20 μL  
 Flow rate: 1000 μL/minute  
 Column Temperature: Ambient  
 Autosampler Temperature: 5°C

**LC chromatographic gradient conditions:**

| <i>Duration (min)</i> | <i>Flow Rate (μL/min)</i> | <i>Mobile Phase A (%)</i> | <i>Mobile Phase B (%)</i> |
|-----------------------|---------------------------|---------------------------|---------------------------|
| 0.0                   | 1000                      | 95                        | 5                         |
| 0.5                   | 1000                      | 5                         | 95                        |
| 2.0                   | 1000                      | 95                        | 5                         |
| 2.5                   | 1000                      | 95                        | 5                         |

**MRM parameters for Compound 1:**

| <i>Analyte</i> | <i>Q1 Mass (amu)</i> | <i>Q3 Mass (amu)</i> | <i>Dwell (msec)</i> | <i>Declustering Potential (V)</i> | <i>Collision Energy (V)</i> | <i>Collision Exit Potential (V)</i> |
|----------------|----------------------|----------------------|---------------------|-----------------------------------|-----------------------------|-------------------------------------|
| Compound 1     | 408.1                | 262.1                | 60                  | 100                               | 35                          | 15                                  |

**Data Analysis Calculations**

Plasma protein binding (PPB) percent (%) unbound from the RED device was calculated as,

$$\% \text{Unbound} = \frac{\text{Average Conc of analyte in the buffer side}}{\text{Average Conc of analyte in the plasma side}} * 100$$

The stability of the protein binding outside the RED device was calculated as,

$$\% \text{Stability outside RED device} = \frac{\text{avg Conc of plasma at 4 h}}{\text{avg Conc of plasma at 0 h}} * 100$$

Brain homogenate protein binding (BrPB) percent (%) unbound from the RED device was calculated as,

$$f_u (\text{brain homogenate}) = \frac{1/Df}{((1/f_u (\text{hom} - 1) + 1/Df)}$$

$f_u$  (hom) = measured fraction unbound in diluted brain homogenate; Df = dilution factor

Supplemental Table 4: Kinase selectivity data of BRD0705, Compound 1, Compound 2, and Compound 3 at 1  $\mu$ M.

| DiscoverX Gene Symbol         | Entrez Gene Symbol | % control with <b>BRD0705</b> | % control with <b>Compound 1</b> | % control with <b>Compound 2</b> | % control with <b>Compound 3</b> |
|-------------------------------|--------------------|-------------------------------|----------------------------------|----------------------------------|----------------------------------|
| AAK1                          | AAK1               | 90                            | 88                               | 97                               | 87                               |
| ABL1(E255K)-phosphorylated    | ABL1               | 78                            | 65                               | 77                               | 79                               |
| ABL1(F317I)-nonphosphorylated | ABL1               | 98                            | 100                              | 100                              | 81                               |
| ABL1(F317I)-phosphorylated    | ABL1               | 98                            | 84                               | 88                               | 63                               |
| ABL1(F317L)-nonphosphorylated | ABL1               | 100                           | 100                              | 100                              | 87                               |
| ABL1(F317L)-phosphorylated    | ABL1               | 100                           | 79                               | 98                               | 70                               |
| ABL1(H396P)-nonphosphorylated | ABL1               | 75                            | 48                               | 88                               | 91                               |
| ABL1(H396P)-phosphorylated    | ABL1               | 81                            | 72                               | 80                               | 100                              |
| ABL1(M351T)-phosphorylated    | ABL1               | 100                           | 93                               | 100                              | 73                               |
| ABL1(Q252H)-nonphosphorylated | ABL1               | 65                            | 34                               | 87                               | 78                               |
| ABL1(Q252H)-phosphorylated    | ABL1               | 66                            | 60                               | 64                               | 96                               |
| ABL1(T315I)-nonphosphorylated | ABL1               | 100                           | 100                              | 95                               | 90                               |
| ABL1(T315I)-phosphorylated    | ABL1               | 100                           | 100                              | 99                               | 77                               |
| ABL1(Y253F)-phosphorylated    | ABL1               | 75                            | 56                               | 71                               | 97                               |
| ABL1-nonphosphorylated        | ABL1               | 61                            | 33                               | 67                               | 100                              |
| ABL1-phosphorylated           | ABL1               | 80                            | 70                               | 97                               | 95                               |
| ABL2                          | ABL2               | 88                            | 89                               | 100                              | 82                               |
| ACVR1                         | ACVR1              | 99                            | 95                               | 98                               | 100                              |
| ACVR1B                        | ACVR1B             | 100                           | 100                              | 100                              | 89                               |
| ACVR2A                        | ACVR2A             | 100                           | 91                               | 100                              | 45                               |
| ACVR2B                        | ACVR2B             | 100                           | 100                              | 100                              | 80                               |
| ACVRL1                        | ACVRL1             | 100                           | 99                               | 92                               | 94                               |
| ADCK3                         | CABC1              | 100                           | 100                              | 100                              | 100                              |
| ADCK4                         | ADCK4              | 96                            | 100                              | 100                              | 100                              |
| AKT1                          | AKT1               | 100                           | 100                              | 100                              | 90                               |
| AKT2                          | AKT2               | 100                           | 100                              | 100                              | 100                              |
| AKT3                          | AKT3               | 100                           | 100                              | 92                               | 99                               |
| ALK                           | ALK                | 79                            | 73                               | 84                               | 81                               |
| ALK(C1156Y)                   | ALK                | 88                            | 68                               | 89                               | 73                               |

|             |        |     |     |     |     |
|-------------|--------|-----|-----|-----|-----|
| ALK(L1196M) | ALK    | 76  | 63  | 58  | 100 |
| AMPK-alpha1 | PRKAA1 | 100 | 100 | 96  | 78  |
| AMPK-alpha2 | PRKAA2 | 91  | 100 | 100 | 90  |
| ANKK1       | ANKK1  | 100 | 100 | 100 | 68  |
| ARK5        | NUAK1  | 80  | 91  | 98  | 100 |
| ASK1        | MAP3K5 | 100 | 100 | 95  | 68  |
| ASK2        | MAP3K6 | 100 | 100 | 100 | 66  |
| AURKA       | AURKA  | 100 | 100 | 100 | 65  |
| AURKB       | AURKB  | 89  | 90  | 65  | 62  |
| AURKC       | AURKC  | 99  | 100 | 100 | 61  |
| AXL         | AXL    | 100 | 89  | 100 | 100 |
| BIKE        | BMP2K  | 58  | 66  | 75  | 62  |
| BLK         | BLK    | 100 | 99  | 90  | 74  |
| BMPR1A      | BMPR1A | 100 | 100 | 100 | 100 |
| BMPR1B      | BMPR1B | 100 | 100 | 98  | 67  |
| BMPR2       | BMPR2  | 97  | 89  | 84  | 66  |
| BMX         | BMX    | 100 | 100 | 100 | 100 |
| BRAF        | BRAF   | 100 | 95  | 100 | 83  |
| BRAF(V600E) | BRAF   | 100 | 98  | 100 | 84  |
| BRK         | PTK6   | 97  | 85  | 100 | 100 |
| BRSK1       | BRSK1  | 92  | 78  | 100 | 100 |
| BRSK2       | BRSK2  | 100 | 100 | 100 | 92  |
| BTK         | BTK    | 97  | 100 | 98  | 77  |
| BUB1        | BUB1   | 100 | 100 | 100 | 64  |
| CAMK1       | CAMK1  | 100 | 100 | 93  | 54  |
| CAMK1B      | PNCK   | 100 | 97  | 88  | 57  |
| CAMK1D      | CAMK1D | 100 | 100 | 100 | 78  |
| CAMK1G      | CAMK1G | 93  | 91  | 97  | 92  |
| CAMK2A      | CAMK2A | 95  | 88  | 100 | 82  |
| CAMK2B      | CAMK2B | 96  | 64  | 100 | 88  |
| CAMK2D      | CAMK2D | 94  | 78  | 100 | 98  |
| CAMK2G      | CAMK2G | 90  | 94  | 100 | 87  |
| CAMK4       | CAMK4  | 100 | 100 | 93  | 100 |
| CAMKK1      | CAMKK1 | 88  | 87  | 100 | 93  |
| CAMKK2      | CAMKK2 | 91  | 100 | 100 | 84  |
| CASK        | CASK   | 96  | 96  | 100 | 74  |
| CDC2L1      | CDK11B | 100 | 100 | 100 | 100 |
| CDC2L2      | CDC2L2 | 100 | 100 | 100 | 100 |
| CDC2L5      | CDK13  | 77  | 92  | 75  | 70  |
| CDK11       | CDK19  | 100 | 100 | 100 | 71  |
| CDK2        | CDK2   | 91  | 97  | 100 | 2.2 |

|                     |          |     |     |     |     |
|---------------------|----------|-----|-----|-----|-----|
| CDK3                | CDK3     | 99  | 97  | 100 | 2.6 |
| CDK4                | CDK4     | 92  | 79  | 71  | 44  |
| CDK4-cyclinD1       | CDK4     | 86  | 90  | 64  | 63  |
| CDK4-cyclinD3       | CDK4     | 100 | 98  | 100 | 86  |
| CDK5                | CDK5     | 100 | 100 | 96  | 70  |
| CDK7                | CDK7     | 100 | 95  | 100 | 86  |
| CDK8                | CDK8     | 100 | 100 | 100 | 100 |
| CDK9                | CDK9     | 100 | 100 | 100 | 100 |
| CDKL1               | CDKL1    | 73  | 61  | 89  | 94  |
| CDKL2               | CDKL2    | 100 | 100 | 100 | 90  |
| CDKL3               | CDKL3    | 100 | 100 | 100 | 100 |
| CDKL5               | CDKL5    | 100 | 100 | 100 | 82  |
| CHEK1               | CHEK1    | 91  | 97  | 83  | 75  |
| CHEK2               | CHEK2    | 100 | 100 | 100 | 88  |
| CIT                 | CIT      | 100 | 99  | 100 | 96  |
| CLK1                | CLK1     | 100 | 93  | 100 | 84  |
| CLK2                | CLK2     | 100 | 91  | 100 | 53  |
| CLK3                | CLK3     | 97  | 94  | 100 | 73  |
| CLK4                | CLK4     | 96  | 100 | 100 | 99  |
| CSF1R               | CSF1R    | 100 | 100 | 100 | 96  |
| CSF1R-autoinhibited | CSF1R    | 100 | 100 | 93  | 73  |
| CSK                 | CSK      | 100 | 100 | 100 | 96  |
| CSNK1A1             | CSNK1A1  | 95  | 95  | 100 | 66  |
| CSNK1A1L            | CSNK1A1L | 100 | 100 | 100 | 74  |
| CSNK1D              | CSNK1D   | 100 | 93  | 100 | 97  |
| CSNK1E              | CSNK1E   | 100 | 100 | 87  | 82  |
| CSNK1G1             | CSNK1G1  | 96  | 56  | 100 | 81  |
| CSNK1G2             | CSNK1G2  | 99  | 85  | 99  | 94  |
| CSNK1G3             | CSNK1G3  | 100 | 100 | 100 | 74  |
| CSNK2A1             | CSNK2A1  | 97  | 100 | 95  | 100 |
| CSNK2A2             | CSNK2A2  | 100 | 100 | 95  | 79  |
| CTK                 | MATK     | 100 | 100 | 95  | 24  |
| DAPK1               | DAPK1    | 68  | 77  | 87  | 100 |
| DAPK2               | DAPK2    | 100 | 100 | 100 | 80  |
| DAPK3               | DAPK3    | 97  | 94  | 100 | 90  |
| DCAMKL1             | DCLK1    | 88  | 74  | 88  | 59  |
| DCAMKL2             | DCLK2    | 100 | 100 | 100 | 100 |
| DCAMKL3             | DCLK3    | 100 | 100 | 85  | 76  |
| DDR1                | DDR1     | 100 | 99  | 95  | 78  |
| DDR2                | DDR2     | 99  | 98  | 95  | 54  |
| DLK                 | MAP3K12  | 100 | 100 | 100 | 58  |



|                              |          |     |     |     |     |
|------------------------------|----------|-----|-----|-----|-----|
| DMPK                         | DMPK     | 96  | 77  | 85  | 77  |
| DMPK2                        | CDC42BPG | 94  | 99  | 91  | 100 |
| DRAK1                        | STK17A   | 97  | 90  | 100 | 81  |
| DRAK2                        | STK17B   | 99  | 99  | 100 | 80  |
| DYRK1A                       | DYRK1A   | 95  | 71  | 69  | 64  |
| DYRK1B                       | DYRK1B   | 86  | 100 | 93  | 100 |
| DYRK2                        | DYRK2    | 100 | 100 | 82  | 55  |
| EGFR                         | EGFR     | 100 | 97  | 100 | 100 |
| EGFR(E746-A750del)           | EGFR     | 97  | 100 | 100 | 86  |
| EGFR(G719C)                  | EGFR     | 100 | 100 | 100 | 100 |
| EGFR(G719S)                  | EGFR     | 100 | 100 | 100 | 88  |
| EGFR(L747-E749del,<br>A750P) | EGFR     | 100 | 65  | 100 | 100 |
| EGFR(L747-S752del,<br>P753S) | EGFR     | 79  | 82  | 64  | 89  |
| EGFR(L747-T751del,Sins)      | EGFR     | 88  | 68  | 89  | 93  |
| EGFR(L858R)                  | EGFR     | 100 | 100 | 99  | 100 |
| EGFR(L858R,T790M)            | EGFR     | 100 | 95  | 100 | 76  |
| EGFR(L861Q)                  | EGFR     | 100 | 100 | 100 | 100 |
| EGFR(S752-I759del)           | EGFR     | 100 | 73  | 99  | 92  |
| EGFR(T790M)                  | EGFR     | 100 | 100 | 100 | 98  |
| EIF2AK1                      | EIF2AK1  | 100 | 100 | 100 | 91  |
| EPHA1                        | EPHA1    | 95  | 100 | 96  | 92  |
| EPHA2                        | EPHA2    | 100 | 100 | 100 | 100 |
| EPHA3                        | EPHA3    | 60  | 27  | 88  | 70  |
| EPHA4                        | EPHA4    | 67  | 75  | 86  | 100 |
| EPHA5                        | EPHA5    | 100 | 100 | 98  | 70  |
| EPHA6                        | EPHA6    | 100 | 100 | 100 | 94  |
| EPHA7                        | EPHA7    | 100 | 100 | 100 | 82  |
| EPHA8                        | EPHA8    | 100 | 100 | 100 | 78  |
| EPHB1                        | EPHB1    | 100 | 100 | 100 | 80  |
| EPHB2                        | EPHB2    | 100 | 100 | 100 | 100 |
| EPHB3                        | EPHB3    | 100 | 100 | 100 | 100 |
| EPHB4                        | EPHB4    | 100 | 100 | 100 | 100 |
| EPHB6                        | EPHB6    | 100 | 90  | 100 | 84  |
| ERBB2                        | ERBB2    | 91  | 88  | 90  | 67  |
| ERBB3                        | ERBB3    | 100 | 100 | 100 | 77  |
| ERBB4                        | ERBB4    | 88  | 100 | 100 | 69  |
| ERK1                         | MAPK3    | 100 | 88  | 93  | 93  |
| ERK2                         | MAPK1    | 100 | 100 | 91  | 95  |
| ERK3                         | MAPK6    | 100 | 98  | 100 | 100 |
| ERK4                         | MAPK4    | 100 | 100 | 100 | 100 |

|                       |         |     |      |     |     |
|-----------------------|---------|-----|------|-----|-----|
| ERK5                  | MAPK7   | 100 | 100  | 100 | 100 |
| ERK8                  | MAPK15  | 100 | 96   | 100 | 36  |
| ERN1                  | ERN1    | 100 | 100  | 81  | 42  |
| FAK                   | PTK2    | 100 | 96   | 100 | 86  |
| FER                   | FER     | 100 | 100  | 100 | 100 |
| FES                   | FES     | 100 | 99   | 100 | 100 |
| FGFR1                 | FGFR1   | 93  | 100  | 100 | 96  |
| FGFR2                 | FGFR2   | 100 | 100  | 100 | 100 |
| FGFR3                 | FGFR3   | 100 | 100  | 100 | 100 |
| FGFR3(G697C)          | FGFR3   | 100 | 100  | 100 | 100 |
| FGFR4                 | FGFR4   | 99  | 82   | 99  | 100 |
| FGR                   | FGR     | 100 | 100  | 100 | 100 |
| FLT1                  | FLT1    | 99  | 99   | 100 | 88  |
| FLT3                  | FLT3    | 100 | 100  | 100 | 99  |
| FLT3(D835H)           | FLT3    | 100 | 100  | 100 | 77  |
| FLT3(D835V)           | FLT3    | 100 | 100  | 89  | 69  |
| FLT3(D835Y)           | FLT3    | 100 | 100  | 100 | 99  |
| FLT3(ITD)             | FLT3    | 100 | 100  | 100 | 93  |
| FLT3(ITD,D835V)       | FLT3    | 100 | 100  | 100 | 69  |
| FLT3(ITD,F691L)       | FLT3    | 92  | 100  | 100 | 65  |
| FLT3(K663Q)           | FLT3    | 80  | 68   | 94  | 94  |
| FLT3(N841I)           | FLT3    | 100 | 100  | 100 | 66  |
| FLT3(R834Q)           | FLT3    | 100 | 100  | 100 | 89  |
| FLT3-autoinhibited    | FLT3    | 100 | 97   | 100 | 78  |
| FLT4                  | FLT4    | 100 | 100  | 100 | 91  |
| FRK                   | FRK     | 100 | 75   | 100 | 100 |
| FYN                   | FYN     | 100 | 92   | 100 | 100 |
| GAK                   | GAK     | 100 | 65   | 100 | 95  |
| GCN2(Kin.Dom.2,S808G) | EIF2AK4 | 85  | 83   | 95  | 100 |
| GRK1                  | GRK1    | 82  | 56   | 100 | 79  |
| GRK2                  | ADRBK1  | 100 | 100  | 94  | 54  |
| GRK3                  | ADRBK2  | 51  | 65   | 51  | 100 |
| GRK4                  | GRK4    | 99  | 100  | 100 | 83  |
| GRK7                  | GRK7    | 100 | 95   | 93  | 92  |
| GSK3A                 | GSK3A   | 8.5 | 0.55 | 0   | 0   |
| GSK3B                 | GSK3B   | 54  | 4.5  | 1.1 | 0.5 |
| HASPIN                | GSG2    | 68  | 86   | 95  | 62  |
| HCK                   | HCK     | 100 | 100  | 100 | 71  |
| HIPK1                 | HIPK1   | 77  | 73   | 78  | 77  |
| HIPK2                 | HIPK2   | 78  | 79   | 75  | 65  |
| HIPK3                 | HIPK3   | 100 | 100  | 81  | 66  |

|                              |        |     |     |     |     |
|------------------------------|--------|-----|-----|-----|-----|
| HIPK4                        | HIPK4  | 100 | 99  | 100 | 74  |
| HPK1                         | MAP4K1 | 72  | 58  | 91  | 73  |
| HUNK                         | HUNK   | 74  | 77  | 76  | 82  |
| ICK                          | ICK    | 100 | 100 | 87  | 15  |
| IGF1R                        | IGF1R  | 100 | 75  | 92  | 86  |
| IKK-alpha                    | CHUK   | 100 | 100 | 90  | 85  |
| IKK-beta                     | IKBKB  | 100 | 100 | 91  | 64  |
| IKK-epsilon                  | IKBKE  | 100 | 100 | 100 | 93  |
| INSR                         | INSR   | 100 | 100 | 100 | 80  |
| INSRR                        | INSRR  | 100 | 100 | 100 | 90  |
| IRAK1                        | IRAK1  | 97  | 95  | 85  | 100 |
| IRAK3                        | IRAK3  | 96  | 82  | 82  | 73  |
| IRAK4                        | IRAK4  | 98  | 95  | 99  | 84  |
| ITK                          | ITK    | 100 | 100 | 100 | 79  |
| JAK1(JH1domain-catalytic)    | JAK1   | 87  | 100 | 100 | 100 |
| JAK1(JH2domain-pseudokinase) | JAK1   | 99  | 100 | 95  | 74  |
| JAK2(JH1domain-catalytic)    | JAK2   | 76  | 77  | 97  | 82  |
| JAK3(JH1domain-catalytic)    | JAK3   | 100 | 100 | 100 | 64  |
| JNK1                         | MAPK8  | 87  | 80  | 94  | 56  |
| JNK2                         | MAPK9  | 100 | 73  | 100 | 59  |
| JNK3                         | MAPK10 | 100 | 64  | 98  | 63  |
| KIT                          | KIT    | 100 | 100 | 100 | 100 |
| KIT(A829P)                   | KIT    | 100 | 100 | 97  | 56  |
| KIT(D816H)                   | KIT    | 100 | 100 | 100 | 65  |
| KIT(D816V)                   | KIT    | 100 | 100 | 100 | 100 |
| KIT(L576P)                   | KIT    | 64  | 89  | 77  | 100 |
| KIT(V559D)                   | KIT    | 100 | 100 | 100 | 100 |
| KIT(V559D,T670I)             | KIT    | 83  | 78  | 84  | 100 |
| KIT(V559D,V654A)             | KIT    | 93  | 97  | 98  | 89  |
| KIT-autoinhibited            | KIT    | 95  | 100 | 90  | 72  |
| LATS1                        | LATS1  | 93  | 96  | 89  | 100 |
| LATS2                        | LATS2  | 100 | 100 | 89  | 79  |
| LCK                          | LCK    | 100 | 100 | 100 | 97  |
| LIMK1                        | LIMK1  | 89  | 94  | 100 | 92  |
| LIMK2                        | LIMK2  | 98  | 100 | 95  | 100 |
| LKB1                         | STK11  | 71  | 52  | 93  | 100 |
| LOK                          | STK10  | 100 | 100 | 99  | 77  |
| LRRK2                        | LRRK2  | 70  | 79  | 83  | 56  |
| LRRK2(G2019S)                | LRRK2  | 77  | 81  | 92  | 74  |
| LTK                          | LTK    | 100 | 100 | 100 | 70  |
| LYN                          | LYN    | 100 | 100 | 100 | 100 |

|             |          |     |     |     |     |
|-------------|----------|-----|-----|-----|-----|
| LZK         | MAP3K13  | 100 | 100 | 100 | 70  |
| MAK         | MAK      | 96  | 49  | 85  | 87  |
| MAP3K1      | MAP3K1   | 100 | 100 | 81  | 62  |
| MAP3K15     | MAP3K15  | 85  | 91  | 90  | 84  |
| MAP3K2      | MAP3K2   | 100 | 100 | 100 | 90  |
| MAP3K3      | MAP3K3   | 95  | 97  | 96  | 73  |
| MAP3K4      | MAP3K4   | 100 | 100 | 100 | 90  |
| MAP4K2      | MAP4K2   | 100 | 100 | 92  | 72  |
| MAP4K3      | MAP4K3   | 96  | 91  | 100 | 100 |
| MAP4K4      | MAP4K4   | 100 | 92  | 87  | 62  |
| MAP4K5      | MAP4K5   | 100 | 100 | 100 | 72  |
| MAPKAPK2    | MAPKAPK2 | 100 | 91  | 100 | 80  |
| MAPKAPK5    | MAPKAPK5 | 100 | 100 | 100 | 89  |
| MARK1       | MARK1    | 93  | 86  | 100 | 86  |
| MARK2       | MARK2    | 67  | 17  | 98  | 84  |
| MARK3       | MARK3    | 90  | 91  | 97  | 96  |
| MARK4       | MARK4    | 100 | 100 | 100 | 89  |
| MAST1       | MAST1    | 100 | 100 | 100 | 100 |
| MEK1        | MAP2K1   | 95  | 88  | 69  | 76  |
| MEK2        | MAP2K2   | 83  | 66  | 91  | 83  |
| MEK3        | MAP2K3   | 88  | 80  | 77  | 87  |
| MEK4        | MAP2K4   | 100 | 100 | 100 | 83  |
| MEK5        | MAP2K5   | 77  | 68  | 76  | 65  |
| MEK6        | MAP2K6   | 92  | 89  | 100 | 95  |
| MELK        | MELK     | 96  | 88  | 95  | 100 |
| MERTK       | MERTK    | 100 | 100 | 100 | 88  |
| MET         | MET      | 74  | 81  | 88  | 93  |
| MET(M1250T) | MET      | 100 | 99  | 100 | 77  |
| MET(Y1235D) | MET      | 100 | 100 | 100 | 75  |
| MINK        | MINK1    | 86  | 100 | 92  | 41  |
| MKK7        | MAP2K7   | 91  | 100 | 88  | 77  |
| MKNK1       | MKNK1    | 100 | 100 | 100 | 65  |
| MKNK2       | MKNK2    | 100 | 100 | 100 | 47  |
| MLCK        | MYLK3    | 89  | 100 | 100 | 83  |
| MLK1        | MAP3K9   | 100 | 92  | 100 | 93  |
| MLK2        | MAP3K10  | 81  | 91  | 100 | 100 |
| MLK3        | MAP3K11  | 100 | 100 | 100 | 92  |
| MRCKA       | CDC42BPA | 95  | 100 | 100 | 100 |
| MRCKB       | CDC42BPB | 100 | 100 | 100 | 100 |
| MST1        | STK4     | 100 | 100 | 95  | 81  |
| MST1R       | MST1R    | 66  | 85  | 68  | 99  |

|           |          |     |     |     |     |
|-----------|----------|-----|-----|-----|-----|
| MST2      | STK3     | 100 | 100 | 96  | 100 |
| MST3      | STK24    | 91  | 88  | 100 | 100 |
| MST4      | MST4     | 100 | 100 | 100 | 59  |
| MTOR      | MTOR     | 67  | 45  | 57  | 100 |
| MUSK      | MUSK     | 100 | 97  | 100 | 93  |
| MYLK      | MYLK     | 100 | 100 | 100 | 92  |
| MYLK2     | MYLK2    | 100 | 100 | 100 | 84  |
| MYLK4     | MYLK4    | 97  | 96  | 100 | 100 |
| MYO3A     | MYO3A    | 100 | 100 | 100 | 75  |
| MYO3B     | MYO3B    | 100 | 100 | 96  | 100 |
| NDR1      | STK38    | 84  | 49  | 94  | 60  |
| NDR2      | STK38L   | 90  | 93  | 98  | 98  |
| NEK1      | NEK1     | 85  | 89  | 100 | 92  |
| NEK10     | NEK10    | 100 | 100 | 100 | 14  |
| NEK11     | NEK11    | 76  | 87  | 92  | 75  |
| NEK2      | NEK2     | 89  | 11  | 100 | 93  |
| NEK3      | NEK3     | 84  | 75  | 93  | 58  |
| NEK4      | NEK4     | 100 | 100 | 95  | 62  |
| NEK5      | NEK5     | 94  | 100 | 100 | 100 |
| NEK6      | NEK6     | 95  | 94  | 80  | 89  |
| NEK7      | NEK7     | 100 | 100 | 100 | 100 |
| NEK9      | NEK9     | 100 | 100 | 100 | 93  |
| NIK       | MAP3K14  | 100 | 100 | 100 | 60  |
| NIM1      | MGC42105 | 99  | 94  | 95  | 61  |
| NLK       | NLK      | 100 | 95  | 100 | 100 |
| OSR1      | OXR1     | 100 | 100 | 100 | 80  |
| p38-alpha | MAPK14   | 100 | 100 | 100 | 71  |
| p38-beta  | MAPK11   | 100 | 100 | 100 | 79  |
| p38-delta | MAPK13   | 100 | 100 | 99  | 100 |
| p38-gamma | MAPK12   | 99  | 100 | 100 | 70  |
| PAK1      | PAK1     | 100 | 100 | 100 | 95  |
| PAK2      | PAK2     | 100 | 100 | 100 | 79  |
| PAK3      | PAK3     | 100 | 100 | 100 | 72  |
| PAK4      | PAK4     | 100 | 100 | 100 | 100 |
| PAK6      | PAK6     | 100 | 100 | 100 | 99  |
| PAK7      | PAK7     | 88  | 93  | 66  | 96  |
| PCK1      | CDK16    | 100 | 99  | 100 | 5.6 |
| PCK2      | CDK17    | 86  | 72  | 100 | 18  |
| PCK3      | CDK18    | 100 | 100 | 100 | 71  |
| PDGFRA    | PDGFRA   | 100 | 100 | 100 | 79  |
| PDGFRB    | PDGFRB   | 100 | 100 | 94  | 100 |

|                       |             |     |     |     |     |
|-----------------------|-------------|-----|-----|-----|-----|
| PDPK1                 | PDPK1       | 100 | 100 | 100 | 77  |
| PFCDPK1(P.falciparum) | CDPK1       | 96  | 100 | 67  | 61  |
| PFPK5(P.falciparum)   | MAL13P1.279 | 100 | 100 | 100 | 43  |
| PFTAIRE2              | CDK15       | 100 | 100 | 100 | 96  |
| PFTK1                 | CDK14       | 100 | 100 | 100 | 100 |
| PHKG1                 | PHKG1       | 96  | 92  | 100 | 100 |
| PHKG2                 | PHKG2       | 98  | 100 | 100 | 86  |
| PIK3C2B               | PIK3C2B     | 100 | 100 | 100 | 70  |
| PIK3C2G               | PIK3C2G     | 92  | 84  | 76  | 88  |
| PIK3CA                | PIK3CA      | 100 | 100 | 100 | 64  |
| PIK3CA(C420R)         | PIK3CA      | 76  | 78  | 85  | 88  |
| PIK3CA(E542K)         | PIK3CA      | 70  | 46  | 57  | 66  |
| PIK3CA(E545A)         | PIK3CA      | 92  | 88  | 96  | 72  |
| PIK3CA(E545K)         | PIK3CA      | 61  | 71  | 59  | 71  |
| PIK3CA(H1047L)        | PIK3CA      | 100 | 100 | 96  | 96  |
| PIK3CA(H1047Y)        | PIK3CA      | 100 | 100 | 100 | 100 |
| PIK3CA(I800L)         | PIK3CA      | 59  | 24  | 58  | 61  |
| PIK3CA(M1043I)        | PIK3CA      | 100 | 98  | 94  | 92  |
| PIK3CA(Q546K)         | PIK3CA      | 86  | 59  | 48  | 63  |
| PIK3CB                | PIK3CB      | 100 | 100 | 100 | 59  |
| PIK3CD                | PIK3CD      | 100 | 100 | 100 | 100 |
| PIK3CG                | PIK3CG      | 100 | 100 | 100 | 70  |
| PIK4CB                | PI4KB       | 94  | 100 | 100 | 66  |
| PIKFYVE               | PIKFYVE     | 100 | 97  | 93  | 81  |
| PIM1                  | PIM1        | 100 | 100 | 100 | 100 |
| PIM2                  | PIM2        | 100 | 100 | 100 | 98  |
| PIM3                  | PIM3        | 100 | 100 | 100 | 100 |
| PIP5K1A               | PIP5K1A     | 98  | 81  | 96  | 59  |
| PIP5K1C               | PIP5K1C     | 65  | 60  | 100 | 100 |
| PIP5K2B               | PIP4K2B     | 100 | 100 | 100 | 100 |
| PIP5K2C               | PIP4K2C     | 91  | 79  | 90  | 100 |
| PKAC-alpha            | PRKACA      | 100 | 100 | 100 | 87  |
| PKAC-beta             | PRKACB      | 100 | 100 | 90  | 84  |
| PKMYT1                | PKMYT1      | 85  | 79  | 99  | 100 |
| PKN1                  | PKN1        | 100 | 100 | 100 | 100 |
| PKN2                  | PKN2        | 100 | 98  | 100 | 66  |
| PKNB(M.tuberculosis)  | pknB        | 100 | 100 | 100 | 75  |
| PLK1                  | PLK1        | 100 | 99  | 100 | 56  |
| PLK2                  | PLK2        | 85  | 81  | 77  | 60  |
| PLK3                  | PLK3        | 100 | 95  | 83  | 60  |
| PLK4                  | PLK4        | 100 | 100 | 95  | 74  |

|                               |          |     |     |     |     |
|-------------------------------|----------|-----|-----|-----|-----|
| PRKCD                         | PRKCD    | 100 | 100 | 100 | 100 |
| PRKCE                         | PRKCE    | 93  | 100 | 100 | 69  |
| PRKCH                         | PRKCH    | 100 | 100 | 100 | 91  |
| PRKCI                         | PRKCI    | 100 | 91  | 100 | 78  |
| PRKCQ                         | PRKCQ    | 73  | 80  | 73  | 100 |
| PRKD1                         | PRKD1    | 100 | 90  | 99  | 88  |
| PRKD2                         | PRKD2    | 76  | 71  | 66  | 100 |
| PRKD3                         | PRKD3    | 95  | 79  | 77  | 76  |
| PRKG1                         | PRKG1    | 100 | 100 | 100 | 88  |
| PRKG2                         | PRKG2    | 100 | 95  | 100 | 85  |
| PRKR                          | EIF2AK2  | 83  | 81  | 100 | 94  |
| PRKX                          | PRKX     | 86  | 83  | 90  | 96  |
| PRP4                          | PRPF4B   | 70  | 77  | 76  | 100 |
| PYK2                          | PTK2B    | 100 | 100 | 100 | 74  |
| QSK                           | KIAA0999 | 94  | 100 | 100 | 57  |
| RAF1                          | RAF1     | 100 | 100 | 97  | 89  |
| RET                           | RET      | 72  | 86  | 92  | 100 |
| RET(M918T)                    | RET      | 100 | 99  | 100 | 78  |
| RET(V804L)                    | RET      | 100 | 100 | 100 | 88  |
| RET(V804M)                    | RET      | 98  | 100 | 89  | 100 |
| RIOK1                         | RIOK1    | 100 | 100 | 100 | 59  |
| RIOK2                         | RIOK2    | 100 | 92  | 84  | 80  |
| RIOK3                         | RIOK3    | 100 | 100 | 95  | 70  |
| RIPK1                         | RIPK1    | 98  | 100 | 100 | 100 |
| RIPK2                         | RIPK2    | 100 | 91  | 100 | 100 |
| RIPK4                         | RIPK4    | 97  | 78  | 74  | 66  |
| RIPK5                         | DSTYK    | 92  | 75  | 86  | 61  |
| ROCK1                         | ROCK1    | 91  | 93  | 84  | 76  |
| ROCK2                         | ROCK2    | 77  | 97  | 76  | 57  |
| ROS1                          | ROS1     | 100 | 98  | 81  | 78  |
| RPS6KA4(Kin.Dom.1-N-terminal) | RPS6KA4  | 100 | 80  | 93  | 78  |
| RPS6KA4(Kin.Dom.2-C-terminal) | RPS6KA4  | 100 | 100 | 100 | 74  |
| RPS6KA5(Kin.Dom.1-N-terminal) | RPS6KA5  | 100 | 100 | 100 | 100 |
| RPS6KA5(Kin.Dom.2-C-terminal) | RPS6KA5  | 86  | 90  | 100 | 98  |
| RSK1(Kin.Dom.1-N-terminal)    | RPS6KA1  | 96  | 92  | 99  | 100 |
| RSK1(Kin.Dom.2-C-terminal)    | RPS6KA1  | 85  | 86  | 97  | 100 |
| RSK2(Kin.Dom.1-N-terminal)    | RPS6KA3  | 100 | 100 | 100 | 82  |

|                            |         |     |     |     |     |
|----------------------------|---------|-----|-----|-----|-----|
| RSK2(Kin.Dom.2-C-terminal) | RPS6KA3 | 55  | 55  | 59  | 68  |
| RSK3(Kin.Dom.1-N-terminal) | RPS6KA2 | 100 | 100 | 100 | 100 |
| RSK3(Kin.Dom.2-C-terminal) | RPS6KA2 | 78  | 73  | 99  | 100 |
| RSK4(Kin.Dom.1-N-terminal) | RPS6KA6 | 100 | 100 | 100 | 84  |
| RSK4(Kin.Dom.2-C-terminal) | RPS6KA6 | 98  | 91  | 100 | 98  |
| S6K1                       | RPS6KB1 | 80  | 68  | 72  | 83  |
| SBK1                       | SBK1    | 100 | 100 | 100 | 72  |
| SGK                        | SGK1    | 95  | 92  | 97  | 90  |
| SgK110                     | SgK110  | 100 | 100 | 100 | 100 |
| SGK2                       | SGK2    | 96  | 100 | 100 | 100 |
| SGK3                       | SGK3    | 100 | 100 | 100 | 68  |
| SIK                        | SIK1    | 100 | 100 | 92  | 100 |
| SIK2                       | SIK2    | 78  | 83  | 100 | 100 |
| SLK                        | SLK     | 100 | 100 | 100 | 89  |
| SNARK                      | NUAK2   | 100 | 100 | 100 | 66  |
| SNRK                       | SNRK    | 86  | 67  | 95  | 89  |
| SRC                        | SRC     | 100 | 100 | 100 | 94  |
| SRMS                       | SRMS    | 100 | 96  | 88  | 69  |
| SRPK1                      | SRPK1   | 95  | 99  | 86  | 81  |
| SRPK2                      | SRPK2   | 95  | 91  | 88  | 87  |
| SRPK3                      | SRPK3   | 100 | 100 | 100 | 84  |
| STK16                      | STK16   | 91  | 90  | 94  | 78  |
| STK33                      | STK33   | 98  | 100 | 96  | 100 |
| STK35                      | STK35   | 98  | 98  | 100 | 100 |
| STK36                      | STK36   | 100 | 100 | 100 | 100 |
| STK39                      | STK39   | 100 | 99  | 88  | 79  |
| SYK                        | SYK     | 100 | 100 | 100 | 98  |
| TAK1                       | MAP3K7  | 81  | 65  | 37  | 31  |
| TAOK1                      | TAOK1   | 100 | 100 | 100 | 61  |
| TAOK2                      | TAOK2   | 92  | 69  | 93  | 79  |
| TAOK3                      | TAOK3   | 100 | 97  | 96  | 71  |
| TBK1                       | TBK1    | 98  | 61  | 100 | 90  |
| TEC                        | TEC     | 98  | 100 | 100 | 88  |
| TESK1                      | TESK1   | 100 | 100 | 100 | 100 |
| TGFBR1                     | TGFBR1  | 98  | 80  | 100 | 97  |
| TGFBR2                     | TGFBR2  | 100 | 100 | 100 | 100 |
| TIE1                       | TIE1    | 100 | 100 | 100 | 80  |
| TIE2                       | TEK     | 100 | 100 | 100 | 65  |



|                              |         |     |     |     |     |
|------------------------------|---------|-----|-----|-----|-----|
| TLK1                         | TLK1    | 91  | 85  | 96  | 100 |
| TLK2                         | TLK2    | 97  | 97  | 100 | 95  |
| TNIK                         | TNIK    | 95  | 92  | 96  | 63  |
| TNK1                         | TNK1    | 100 | 100 | 100 | 100 |
| TNK2                         | TNK2    | 99  | 97  | 99  | 100 |
| TNNI3K                       | TNNI3K  | 98  | 78  | 99  | 100 |
| TRKA                         | NTRK1   | 95  | 88  | 100 | 64  |
| TRKB                         | NTRK2   | 79  | 89  | 99  | 74  |
| TRKC                         | NTRK3   | 83  | 75  | 77  | 88  |
| TRPM6                        | TRPM6   | 100 | 100 | 97  | 77  |
| TSSK1B                       | TSSK1B  | 95  | 85  | 90  | 95  |
| TSSK3                        | TSSK3   | 98  | 100 | 100 | 87  |
| TTK                          | TTK     | 100 | 100 | 100 | 80  |
| TXK                          | TXK     | 100 | 100 | 100 | 89  |
| TYK2(JH1domain-catalytic)    | TYK2    | 100 | 100 | 100 | 66  |
| TYK2(JH2domain-pseudokinase) | TYK2    | 100 | 82  | 47  | 45  |
| TYRO3                        | TYRO3   | 100 | 100 | 99  | 100 |
| ULK1                         | ULK1    | 100 | 98  | 100 | 67  |
| ULK2                         | ULK2    | 100 | 95  | 77  | 72  |
| ULK3                         | ULK3    | 84  | 69  | 91  | 48  |
| VEGFR2                       | KDR     | 100 | 100 | 100 | 82  |
| VPS34                        | PIK3C3  | 94  | 97  | 88  | 56  |
| VRK2                         | VRK2    | 100 | 100 | 100 | 64  |
| WEE1                         | WEE1    | 100 | 100 | 100 | 92  |
| WEE2                         | WEE2    | 100 | 100 | 100 | 74  |
| WNK1                         | WNK1    | 100 | 100 | 100 | 81  |
| WNK2                         | WNK2    | 100 | 100 | 100 | 73  |
| WNK3                         | WNK3    | 100 | 100 | 100 | 80  |
| WNK4                         | WNK4    | 83  | 81  | 77  | 89  |
| YANK1                        | STK32A  | 100 | 100 | 100 | 81  |
| YANK2                        | STK32B  | 83  | 88  | 82  | 91  |
| YANK3                        | STK32C  | 100 | 73  | 100 | 97  |
| YES                          | YES1    | 100 | 95  | 100 | 100 |
| YSK1                         | STK25   | 83  | 85  | 90  | 85  |
| YSK4                         | MAP3K19 | 98  | 67  | 100 | 60  |
| ZAK                          | ZAK     | 100 | 100 | 100 | 100 |
| ZAP70                        | ZAP70   | 100 | 100 | 91  | 75  |

Supplemental Table 4: Competitive Ligand Binding Assay for (KINOMEScan Technology; Eurofins)

$$\% \text{ Control Calculation} = \frac{\text{Test Compound Signal} - \text{Positive Control Signal}}{\text{Negative Control Signal} - \text{Positive Control Signal}}$$

## Supplemental Methods: Novel compound synthesis and Characterization

Preparation of 4-ethyl-8-fluoro-7,7-dimethyl-4-(3-(trifluoromethyl)phenyl)-2,4,6,7,8,9-hexahydro-5H-pyrazolo[3,4-b]quinolin-5-one:

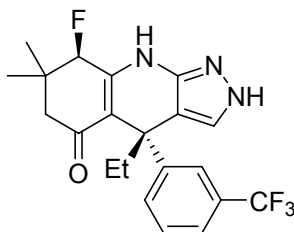

Step 1: 1H-pyrazol-3-amine (164 mg, 1.98 mmol), 1-[3-(trifluoromethyl)phenyl]propan-1-one (400 mg, 1.98 mmol, 333  $\mu$ L), and pTSA (37.7 mg, 198  $\mu$ mol) were combined then toluene (4.00 mL) was added and the mixture was heated to 110°C for 16 hours. The reaction was then cooled to room temperature and concentrated and the crude residue was purified by column chromatography (0 to 30% MeOH in CH<sub>2</sub>Cl<sub>2</sub>) to give 4-[1-[3-(trifluoromethyl)phenyl]prop-1-enyl]-1H-pyrazol-3-amine (510 mg, 1.91 mmol, 96.4% yield). LCMS: Rt = 1.25 min, m/z 268.1.

Step 2: 4-fluoro-5,5-dimethyl-cyclohexane-1,3-dione (79.9 mg, 505  $\mu$ mol) and 4-[(E)-1-[3-(trifluoromethyl)phenyl]prop-1-enyl]-1H-pyrazol-3-amine (135 mg, 505  $\mu$ mol) were combined and dissolved in TFA (1.00 mL) and the mixture was heated to 110°C for 4 hours. The mixture was then cooled to room temperature and concentrated. The crude residue was purified with preparatory HPLC to give 4-ethyl-8-fluoro-7,7-dimethyl-4-[3-(trifluoromethyl)phenyl]-2,6,8,9-tetrahydropyrazolo[3,4-b]quinolin-5-one (37.0 mg, 90.8  $\mu$ mol, 18% yield) as a mixture of isomers. LCMS: Rt = 1.59 min, m/z 408.2. The mixture of isomers was then purified by chiral SFC (CHIRALPAK IB 30x250mm, 5 $\mu$ m, Method: 30% Methanol with 0.1% diethyl amine in CO<sub>2</sub> [flow rate: 100mL/min, ABPR 120bar, MBPR 40psi]) to provide four stereoisomers (Rt: Peak 1: 2.22 min, Peak 2: 2.63, Peak 3: 3.05, Peak 4: 3.41). Compound 1 was isolated as peak 1 from the separation method.

Peak 1: 40.4 mg (95% purity, 100% ee). LCMS: Rt = 1.76 min, m/z 408.2. <sup>1</sup>H NMR (500 MHz, METHANOL-d<sub>4</sub>)  $\delta$  7.65 (s, 1H), 7.63 (br d, J=7.63 Hz, 1H), 7.42-7.31 (m, 2H), 6.96 (s, 1H), 4.47 (d, J=49.4 Hz, 1H), 3.08-2.98 (m, 1H), 2.85-2.78 (m, 1H), 2.63-2.54 (m, 1H), 2.15-2.05 (m, 1H), 1.22-1.17 (m, 3H), 1.14-1.09 (m, 3H), 0.86-0.78 (m, 3H). <sup>13</sup>C NMR (151 MHz, METHANOL-d<sub>4</sub>)  $\delta$  190.3, 155.0, 152.6, 130.6, 129.2, 127.9, 126.0, 123.7, 122.9, 121.5, 110.7, 106.7, 97.1, 95.9, 45.0, 39.6, 36.3, 31.1, 25.0, 19.1, 9.0. <sup>19</sup>F NMR (471 MHz, METHANOL-d<sub>4</sub>)  $\delta$  -59.9 (s, 1F) -198.9 (br s, 1F).

Peak 2: 28.2 mg (95% purity, 100% ee). LCMS: Rt = 1.73 min, m/z 408.2. <sup>1</sup>H NMR (400 MHz, CHLOROFORM-d)  $\delta$  7.60 (s, 2H), 7.36 (br. s., 2H), 6.90 (s, 1H), 4.26 - 4.56 (m, 1H), 2.93 - 3.16 (m, 1H), 2.41 - 2.59 (m, 2H), 1.95 - 2.14 (m, 1H), 1.23 (s, 3H), 1.08 (s, 3H), 0.77 (t, J = 7.40 Hz, 3H).

Peak 3: 13.3 mg (95% purity, 100% ee). LCMS: Rt = 1.73 min, m/z 408.2. <sup>1</sup>H NMR (400 MHz, CHLOROFORM-d)  $\delta$  7.60 (s, 2H), 7.36 (br. s., 2H), 6.90 (s, 1H), 4.31 - 4.61 (m, 1H), 2.95 - 3.14 (m, 1H), 2.35 - 2.59 (m, 2H), 1.90 - 2.19 (m, 1H), 1.23 (s, 3H), 1.08 (s, 3H), 0.77 (t, J = 7.28 Hz, 3H).

Peak 4: 16.9 mg (95% purity, 100% ee). LCMS: Rt = 1.75 min, m/z 408.2. <sup>1</sup>H NMR (400 MHz, CHLOROFORM-d) δ 7.60 (s, 2H), 7.36 (s, 2H), 6.86 (s, 1H), 4.18 - 4.52 (m, 1H), 2.98 - 3.26 (m, 1H), 2.34 - 2.60 (m, 2H), 1.93 - 2.14 (m, 1H), 1.20 (s, 3H), 1.17 (s, 3H), 0.82 (t, J = 7.28 Hz, 3H).

Intermediates were synthesized according to the following scheme.

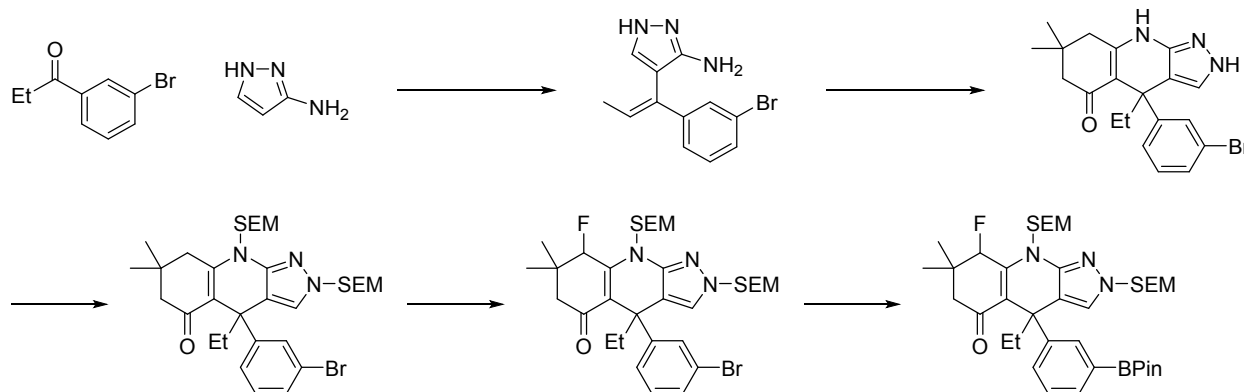

Preparation of 4-(1-(3-bromophenyl)prop-1-en-1-yl)-1H-pyrazol-3-amine (mixture of E/Z isomers):

1H-pyrazol-3-amine (3.50 g, 42.1 mmol), 1-(3-bromophenyl)propan-1-one (8.98 g, 42.1 mmol) and 4-methylbenzenesulfonic acid hydrate (801 mg, 4.21 mmol) were combined then toluene (50.0 mL) was added. The mixture was stirred at 125°C for 18 hours under N<sub>2</sub> atmosphere. The mixture was then concentrated and the residue was purified by flash chromatography (CH<sub>2</sub>Cl<sub>2</sub>:MeOH = 100:0 to 99:1 to 98:2) to supply 4-(1-(3-bromophenyl)prop-1-en-1-yl)-1H-pyrazol-3-amine (10.0 g, 35.95 mmol, 85% yield, 98% purity) as a mixture of isomers and as a pale-yellow solid. LCMS m/z = 279.9 (M+H)<sup>+</sup>.

Preparation of 4-(3-bromophenyl)-4-ethyl-7,7-dimethyl-2,4,6,7,8,9-hexahydro-5H-pyrazolo[3,4-b]quinolin-5-one:

4-(1-(3-bromophenyl)prop-1-en-1-yl)-1H-pyrazol-3-amine (10.0 g, 35.95 mmol) and 5,5-dimethylcyclohexane-1,3-dione (5.04 g, 35.95 mmol) were dissolved in trifluoroethanol (71.9 mL) and TFA (4.10 g, 35.95 mmol, 2.75 mL) was then added. The mixture was split into four microwave vials. The vials were then heated to 150°C in a microwave for 1.5 hours then cooled to room temperature. The samples were combined and the mixture was concentrated and purified by column chromatography (5-50% EtOAc/EtOH : Heptanes) to provide 4-(3-bromophenyl)-4-ethyl-7,7-dimethyl-2,4,6,7,8,9-hexahydro-5H-pyrazolo[3,4-b]quinolin-5-one (4.11 g, 10.27 mmol, 29% yield). LCMS m/z = 402.1 (M+H)<sup>+</sup>.

Preparation of 4-(3-bromophenyl)-4-ethyl-7,7-dimethyl-2,9-bis((2-(trimethylsilyl)ethoxy)methyl)-2,4,6,7,8,9-hexahydro-5H-pyrazolo[3,4-b]quinolin-5-one:

A solution of 4-(3-bromophenyl)-4-ethyl-7,7-dimethyl-2,4,6,7,8,9-hexahydro-5H-pyrazolo[3,4-b]quinolin-5-one (4.40 g, 10.99 mmol) in THF (110 mL) was cooled to 0°C and sodium hydride (923 mg, 38.5 mmol, 60% in mineral oil) was added portion wise. After the addition, the mixture was stirred at 0°C for 1 hour. SEM-chloride (7.33 g, 43.96 mmol, 7.80 mL) was then added dropwise and the resulting mixture was stirred at 0°C for 2 hour then warmed to room temperature and stirred overnight. The mixture was poured into 50 mL of ice-water slowly, then extracted with EtOAc (30 mL×2). The combined organic layers were dried over MgSO<sub>4</sub> and concentrated. The residue was purified by column chromatography (5-20% EtOAc in heptane) to supply 4-(3-bromophenyl)-4-ethyl-7,7-dimethyl-2,9-bis((2-(trimethylsilyl)ethoxy)methyl)-2,4,6,7,8,9-hexahydro-5H-pyrazolo[3,4-b]quinolin-5-one (5.40 g, 8.17 mmol, 74% yield) as pale-yellow gum. LCMS m/z = 662.3 (M+H)+.

Preparation of 4-(3-bromophenyl)-4-ethyl-8-fluoro-7,7-dimethyl-2,9-bis((2-(trimethylsilyl)ethoxy)methyl)-2,4,6,7,8,9-hexahydro-5H-pyrazolo[3,4-b]quinolin-5-one:

4-(3-bromophenyl)-4-ethyl-7,7-dimethyl-2,9-bis((2-(trimethylsilyl)ethoxy)methyl)-2,4,6,7,8,9-hexahydro-5H-pyrazolo[3,4-b]quinolin-5-one (1.52 g, 2.30 mmol) was dissolved in THF (23.0 mL) and cooled in a dry ice-acetone bath to -78°C. [bis(trimethylsilyl)amino]lithium (1 M in toluene, 2.19 mL) was then added and the mixture was stirred for 30 minutes then warmed to 0°C and stirred for an additional 30 minutes. The mixture was then cooled to -78°C and NFSI (798 mg, 2.53 mmol) was added. The mixture was allowed to warm to room temperature overnight. The mixture was then quenched upon addition of water and saturated, aqueous NH<sub>4</sub>Cl. The mixture was then extracted with ethyl acetate (50mL x 3) and the combined organic layers were dried over sodium sulfate, filtered, and concentrated. The crude material was then purified by column chromatography (5 to 25% EtOAc in heptanes) to provide 4-(3-bromophenyl)-4-ethyl-8-fluoro-7,7-dimethyl-2,9-bis((2-(trimethylsilyl)ethoxy)methyl)-2,4,6,7,8,9-hexahydro-5H-pyrazolo[3,4-b]quinolin-5-one (1.15 g, 1.69 mmol, 74% yield) as a mixture of diastereomers. LCMS m/z = 680.7 (M+H)+.

Preparation of 4-ethyl-8-fluoro-7,7-dimethyl-4-(3-(4,4,5,5-tetramethyl-1,3,2-dioxaborolan-2-yl)phenyl)-2,9-bis((2-(trimethylsilyl)ethoxy)methyl)-2,4,6,7,8,9-hexahydro-5H-pyrazolo[3,4-b]quinolin-5-one:

4-(3-bromophenyl)-4-ethyl-8-fluoro-7,7-dimethyl-2,9-bis((2-(trimethylsilyl)ethoxy)methyl)-2,4,6,7,8,9-hexahydro-5H-pyrazolo[3,4-b]quinolin-5-one (297 mg, 437 μmol), 4,4,5,5-tetramethyl-2-(4,4,5,5-tetramethyl-1,3,2-dioxaborolan-2-yl)-1,3,2-dioxaborolane (144 mg, 568 μmol), Pd(dppf)Cl<sub>2</sub>-CH<sub>2</sub>Cl<sub>2</sub> (17.9 mg, 21.85 μmol) and KOAc (85.8 mg, 874 μmol) were combined in a vial and dissolved in dioxane (2.19 mL). Nitrogen was bubbled through the solution for 5 min then the vial was sealed and stirred at 100°C for 18 hours. The mixture was then concentrated and dissolved in EtOAc. The mixture was filtered and the filtrate was concentrated. The residue was purified by column chromatography (5 to 60% EtOAc in heptanes) to afford 4-ethyl-8-fluoro-7,7-dimethyl-4-(3-(4,4,5,5-tetramethyl-1,3,2-dioxaborolan-2-yl)phenyl)-2,9-bis((2-(trimethylsilyl)ethoxy)methyl)-2,4,6,7,8,9-hexahydro-5H-pyrazolo[3,4-b]quinolin-5-one (231 mg, 318 μmol, 73% yield) as an orange oil. LCMS m/z = 726.9 (M+H)+.

Preparation of 4-(3-(1,3-dimethyl-1H-pyrazol-4-yl)phenyl)-4-ethyl-8-fluoro-7,7-dimethyl-2,4,6,7,8,9-hexahydro-5H-pyrazolo[3,4-b]quinolin-5-one (**Compound 2**):

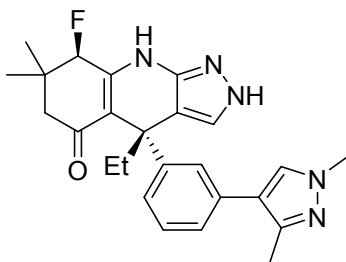

4-(3-bromophenyl)-4-ethyl-8-fluoro-7,7-dimethyl-2,9-bis((2-(trimethylsilyl)ethoxy)methyl)-2,4,6,7,8,9-hexahydro-5H-pyrazolo[3,4-b]quinolin-5-one (200 mg, 295  $\mu\text{mol}$ ), 1,3-dimethyl-4-(4,4,5,5-tetramethyl-1,3,2-dioxaborolan-2-yl)pyrazole (131 mg, 589  $\mu\text{mol}$ ), [2-(2-aminophenyl)phenyl]-methylsulfonyloxy-palladium;dicyclohexyl-[2-(2,4,6-triisopropylphenyl)phenyl]phosphane (12.5 mg, 14.7  $\mu\text{mol}$ ), and potassium phosphate tribasic (125 mg, 589  $\mu\text{mol}$ ) were added to a reaction vial. The vial was then sealed and degassed by evacuating and backfilling with nitrogen. Dioxane (786  $\mu\text{L}$ ) and water (393  $\mu\text{L}$ ) were then added and the mixture was stirred at 100°C for 24 hours. The mixture was then cooled to room temperature, concentrated, and used directly in the next step.

The crude mixture of 4-[3-(1,3-dimethylpyrazol-4-yl)phenyl]-4-ethyl-7,7-dimethyl-2,9-bis(2-trimethylsilylethoxymethyl)-6,8-dihydropyrazolo[3,4-b]quinolin-5-one (204.5 mg, 302.5  $\mu\text{mol}$ ) was dissolved in TFA (1.51 mL) and  $\text{CH}_2\text{Cl}_2$  (4.54 mL) and stirred at room temperature for 3 hours under nitrogen. The mixture was then concentrated and purified by column chromatography (5-100% [3:1 EtOAc:EtOH] in heptanes). The residue obtained was then purified by chiral SFC (CHIRALPAK IB 30x250mm, 5 $\mu\text{m}$ , Method: 30% MeOH w/ 0.1% DEA in  $\text{CO}_2$  [flow rate: 100mL/min, ABPR 120bar, MBPR 40psi, column temp 40 deg C]) to provide four stereoisomers (Rt: Peak 1: 2.36 min, Peak 2: 2.63, Peak 3: 2.89, Peak 4: 3.31). Compound 2 was isolated as peak 2 from the separation method.

Peak 1: 11.3 mg (98.5% purity, 100% ee, 0.5 equiv Diethylamine solvate). LCMS  $m/z$  = 434.6 (M+H)<sup>+</sup>. <sup>1</sup>H NMR (500 MHz, METHANOL- $d_4$ )  $\delta$  ppm 7.57-7.64 (m, 1H), 7.39 (t, J=1.83 Hz, 1H), 7.18-7.31 (m, 2H), 7.11 (d, J=7.33 Hz, 1H), 7.02 (s, 1H), 5.13-5.26 (m, 1H), 3.84 (s, 3H), 3.06-3.14 (m, 1H), 3.03 (q, J=7.33 Hz, 2H), 2.35 (dd, J=16.79, 4.58 Hz, 1H), 2.25-2.29 (m, 3H), 2.03-2.18 (m, 2H), 1.30 (t, J=7.33 Hz, 3H), 1.12-1.20 (m, 6H), 0.80-0.86 (m, 3H).

Peak 2: 14.0 mg (95.9% purity, 94.7% ee). LCMS  $m/z$  = 434.6 (M+H)<sup>+</sup>. <sup>1</sup>H NMR (500 MHz, METHANOL- $d_4$ )  $\delta$  ppm 7.61 (s, 1H), 7.48-7.37 (m, 1H), 7.34-7.27 (m, 1H), 7.24 (t, J=7.63 Hz, 1H), 7.15-7.10 (m, 1H), 7.01 (s, 1H), 5.25-5.01 (m, 1H), 3.84 (s, 3H), 3.11-2.97 (m, 1H), 2.33-2.18 (m, 5H), 2.17-2.08 (m, 1H), 1.20 (s, 3H), 1.14 (d, J=1.22 Hz, 3H), 0.81 (t, J=7.33 Hz, 3H). <sup>13</sup>C NMR (151 MHz, METHANOL- $d_4$ )  $\delta$  196.2, 155.9, 153.7, 146.7, 135.5, 133.9, 131.0, 129.1, 127.5, 127.3, 126.1, 125.5, 125.4, 122.9, 109.8, 94.5, 38.6, 37.4, 37.3, 32.1, 25.9, 22.6, 22.6, 13.2, 11.0. <sup>19</sup>F NMR (471 MHz, METHANOL- $d_4$ )  $\delta$  -193.25 (br s, 1 F).

Peak 3: 15.2 mg (96.7% purity, 84.3% ee). LCMS  $m/z = 434.6$  (M+H)<sup>+</sup>. <sup>1</sup>H NMR (500 MHz, METHANOL-*d*<sub>4</sub>)  $\delta$  ppm 7.61 (s, 1H), 7.41 (t,  $J=1.83$  Hz, 1H), 7.28-7.34 (m, 1H), 7.24 (t,  $J=7.63$  Hz, 1H), 7.12 (dt,  $J=7.63$ , 1.37 Hz, 1H), 7.01 (s, 1H), 5.08-5.23 (m, 1H), 3.84 (s, 3H), 3.01-3.10 (m, 1H), 2.19-2.33 (m, 5H), 2.07-2.16 (m, 1H), 1.20 (s, 3H), 1.14 (d,  $J=1.22$  Hz, 3H), 0.81 (t,  $J=7.33$  Hz, 3H).

Peak 4: 9.7 mg (98.4% purity, 83.8% ee). LCMS  $m/z = 434.6$  (M+H)<sup>+</sup>. <sup>1</sup>H NMR (500 MHz, METHANOL-*d*<sub>4</sub>)  $\delta$  ppm 7.62 (s, 1H), 7.37-7.42 (m, 1H), 7.24-7.29 (m, 1H), 7.20-7.24 (m, 1H), 7.09-7.13 (m, 1H), 7.02 (s, 1H), 5.08-5.26 (m, 1H), 3.84 (s, 3H), 3.05-3.13 (m, 1H), 2.31-2.39 (m, 1H), 2.28 (s, 3H), 2.06-2.18 (m, 2H), 1.10-1.19 (m, 6H), 0.83 (t,  $J=7.33$  Hz, 3H).

Preparation of 4-ethyl-8-fluoro-4-(3-(3-fluoro-5-methoxypyridin-4-yl)phenyl)-7,7-dimethyl-2,4,6,7,8,9-hexahydro-5H-pyrazolo[3,4-*b*]quinolin-5-one:

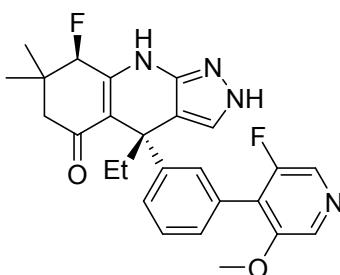

4-ethyl-8-fluoro-7,7-dimethyl-4-(3-(4,4,5,5-tetramethyl-1,3,2-dioxaborolan-2-yl)phenyl)-2,9-bis((2-(trimethylsilyl)ethoxy)methyl)-2,4,6,7,8,9-hexahydro-5H-pyrazolo[3,4-*b*]quinolin-5-one (231 mg, 318  $\mu$ mol), 4-bromo-3-fluoro-5-methoxy-pyridine (65.5 mg, 318  $\mu$ mol), [2-(2-aminophenyl)phenyl]-methylsulfonyloxy-palladium;dicyclohexyl-[2-(2,4,6-triisopropylphenyl)phenyl]phosphane (13.5 mg, 15.9  $\mu$ mol), and potassium phosphate tribasic (135 mg, 636  $\mu$ mol) were added to a reaction vial. The vial was then sealed and degassed by evacuating and backfilling with nitrogen. Dioxane (848  $\mu$ L) and water (424  $\mu$ L) were then added and the mixture was stirred at 100°C for 24 hours. The mixture was then cooled to room temperature, concentrated, and used directly in the next step. LCMS  $m/z = 725.8$  (M+H)<sup>+</sup>.

4-ethyl-8-fluoro-4-[3-(3-fluoro-5-methoxy-4-pyridyl)phenyl]-7,7-dimethyl-2,9-bis(2-trimethylsilylethoxymethyl)-6,8-dihydropyrazolo[3,4-*b*]quinolin-5-one (230 mg, 317  $\mu$ mol) was dissolved in TFA (1.50 mL) and CH<sub>2</sub>Cl<sub>2</sub> (4.50 mL) and stirred at room temperature for 3 hours under nitrogen. The mixture was then concentrated and purified by column chromatography (5-100% [3:1 EtOAc:EtOH] in heptanes). The residue obtained was then purified by chiral SFC (CHIRALPAK IB 30x250mm, 5 $\mu$ m, Method: 30% MeOH w/ 0.1% DEA in CO<sub>2</sub> [flow rate: 100mL/min, ABPR 120bar, MBPR 40psi, column temp 40 deg C]) to provide four stereoisomers (Rt: Peak 1: 2.44 min, Peak 2: 2.91, Peak 3: 3.30, Peak 4: 4.04). Compound 3 was isolated as peak 2 from the separation method.

Peak 1: 9.8 mg (95.7% purity, 100% ee). LCMS  $m/z = 465.5$  (M+H)<sup>+</sup>. <sup>1</sup>H NMR (500 MHz, METHANOL-*d*<sub>4</sub>)  $\delta$  ppm 8.22 (s, 1H), 8.17 (s, 1H), 7.46 (d,  $J=8.55$  Hz, 1H), 7.39 (s, 1H), 7.31 (t,  $J=7.94$  Hz, 1H), 7.14 (d,

J=6.71 Hz, 1H), 7.01 (s, 1H), 5.09-5.22 (m, 1H), 3.85 (s, 3H), 3.00-3.09 (m, 2H), 2.34 (dd, J=16.48, 4.88 Hz, 1H), 2.14 (d, J=16.48 Hz, 1H), 2.06-2.11 (m, 1H), 1.15 (d, J=8.55 Hz, 6H), 0.81 (t, J=7.33 Hz, 3H).

**Compound 3: Peak 2:** 13.1 mg (98% purity, 97.8% ee). LCMS m/z = 465.6 (M+H)<sup>+</sup>. <sup>1</sup>H NMR (500 MHz, METHANOL-d<sub>4</sub>) δ ppm 8.24 (s, 1H), 8.19 (s, 1H), 7.49 (d, J=7.94 Hz, 1H), 7.43 (d, J=1.83 Hz, 1H), 7.33 (t, J=7.63 Hz, 1H), 7.19-7.14 (m, 1H), 7.02 (s, 1H), 5.25-5.11 (m, 1H), 3.91-3.85 (m, 3H), 3.09-2.98 (m, 1H), 2.34-2.21 (m, 2H), 2.15-2.06 (m, 1H), 1.20 (s, 3H), 1.13 (d, J=1.22 Hz, 3H), 0.81 (t, J=7.33 Hz, 3H). <sup>13</sup>C NMR (151 MHz, METHANOL-d<sub>4</sub>) δ 195.9, 159.2, 157.5, 155.6, 153.4, 132.4, 132.3, 131.7, 131.6, 130.5, 129.4, 128.7, 128.3, 128.0, 127.7, 113.3, 95.7, 94.5, 58.0, 49.9, 37.6, 32.4, 26.2, 22.5, 22.5, 11.1. <sup>19</sup>F NMR (471 MHz, METHANOL-d<sub>4</sub>) δ -132.7 (s, 1F) -192.9 (br s, 1F).

Peak 3: 13.3 mg (96.8% purity, 95.1% ee). LCMS m/z = 465.6 (M+H)<sup>+</sup>. <sup>1</sup>H NMR (500 MHz, METHANOL-d<sub>4</sub>) δ ppm 8.22 (s, 1H), 8.18 (s, 1H), 7.48 (d, J=9.16 Hz, 1H), 7.42 (s, 1H), 7.32 (t, J=7.63 Hz, 1H), 7.15 (d, J=6.71 Hz, 1H), 7.00 (s, 1H), 5.09-5.23 (m, 1H), 3.86 (s, 3H), 3.02 (dd, J=12.82, 7.33 Hz, 1H), 2.18-2.31 (m, 2H), 2.09 (dd, J=12.82, 6.71 Hz, 1H), 1.18 (s, 3H), 1.11 (d, J=1.22 Hz, 3H), 0.79 (t, J=7.33 Hz, 3H).

Peak 4: 8.7 mg (97% purity, 100% ee). LCMS m/z = 465.6 (M+H)<sup>+</sup>. <sup>1</sup>H NMR (500 MHz, METHANOL-d<sub>4</sub>) δ ppm 8.21 (s, 1H), 8.17 (s, 1H), 7.46 (d, J=8.55 Hz, 1H), 7.39 (s, 1H), 7.31 (t, J=7.63 Hz, 1H), 7.14 (d, J=7.33 Hz, 1H), 7.01 (s, 1H), 5.08-5.25 (m, 1H), 3.85 (s, 3H), 3.04 (dd, J=12.51, 7.63 Hz, 1H), 2.34 (dd, J=16.79, 4.58 Hz, 1H), 2.14 (d, J=17.09 Hz, 1H), 2.09 (dd, J=12.82, 7.33 Hz, 1H), 1.15 (d, J=9.77 Hz, 6H), 0.81 (t, J=7.33 Hz, 3H).
